1 **Title**

2 ACCLIMATION OF PHOTOSYNTHESIS TO THE ENVIRONMENT 1 regulates  
3 Photosystem II Supercomplex dynamics in response to light in *Chlamydomonas*  
4 *reinhardtii*

5

6 **Short title**

7 Photosynthetic electron transport regulation

8

9 Marie Chazaux<sup>1</sup>, Stefano Caffarri<sup>1</sup>, Juliane Da Graça<sup>1</sup>, Stephan Cui<sup>1</sup>, Magali  
10 Floriani<sup>2</sup>, Pawel Brzezowski<sup>1\*</sup>, Gilles Peltier<sup>1</sup>, Bernard Genty<sup>1</sup>, Jean Alric<sup>1</sup> and Xenie  
11 Johnson<sup>1+</sup>

12

13 <sup>1</sup>Aix Marseille Univ., CEA, CNRS, Biosciences and Biotechnology Institute Aix-  
14 Marseille, Saint Paul-Lez-Durance, France F-13108

15

16 <sup>2</sup>Institut de Radioprotection et de Sûreté Nucléaire (IRSN), PRP-ENV/SRTE/LECO,  
17 Cadarache, Saint-Paul-Lez-Durance, France F-13108

18

19 \*present address: Humboldt Universität zu Berlin, Institut für Biologie, AG  
20 Pflanzenphysiologie, Berlin, Germany

21 +corresponding author. [xenie.johnson@cea.fr](mailto:xenie.johnson@cea.fr)

22

23 The author responsible for distribution of materials integral to the findings presented  
24 in this article in accordance with the policy described in the Instructions for Authors  
25 ([www.plantcell.org](http://www.plantcell.org)) is: Xenie Johnson ([xenie.johnson@cea.fr](mailto:xenie.johnson@cea.fr)).

26

27 **Abstract (170 words)**

28

29 Photosynthetic organisms require acclimation mechanisms to regulate  
30 photosynthesis in response to light conditions. Here, two mutant alleles of  
31 *ACCLIMATION OF PHOTOSYNTHESIS TO THE ENVIRONMENT 1* (*ape1*) have  
32 been characterized in *Chlamydomonas reinhardtii*. The *ape1* mutants are  
33 photosensitive and show PSII photoinhibition during high light acclimation or under  
34 high light stress. The *ape1* mutants retain more PSII super-complexes and have  
35 changes to thylakoid stacking relative to control strains during photosynthetic growth  
36 at different light intensities. The APE1 protein is found in all oxygenic phototrophs and  
37 encodes a 25 kDa thylakoid protein that interacts with the Photosystem II core  
38 complex as monomers, dimers and supercomplexes. We propose a model where  
39 APE1 bound to PSII supercomplexes releases core complexes and promotes PSII  
40 heterogeneity influencing the stacking of *Chlamydomonas* thylakoids. APE1 is a  
41 regulator in light acclimation and its function is to reduce over-excitation of PSII  
42 centres and avoid PSII photoinhibition to increase the resilience of photosynthesis to  
43 high light.

44

## 45 **Introduction**

46 In plants, algae and cyanobacteria, photosynthetic electron transport is tightly linked  
47 to light capture and CO<sub>2</sub> assimilation. Depending on light intensity and CO<sub>2</sub>  
48 availability, either the light reactions or carbon metabolism will be limiting for  
49 photosynthesis (Farquhar et al., 1980). Balancing the two results in poisoning the  
50 electron carriers along the chain from the Photosystem II (PSII) electron acceptors  
51 (plastoquinones) to the Photosystem I (PSI) electron acceptors (Fd, FNR, NADP<sup>+</sup>).  
52 This energetic balance must be constantly tuned to environmental cues in order to  
53 avoid over-reduction of the photosynthetic apparatus and photo-damage. Referred to  
54 as photosynthetic acclimation, it involves both fast regulation of thylakoid proteins as  
55 well as slower, long-term changes to light harvesting and photosystem stoichiometry  
56 (for reviews see (Anderson et al., 1995; Erickson et al., 2015; Walters, 2005)).

57 PSII is the water splitting primary reaction component of the electron transport chain  
58 of oxygenic photosynthesis. It is a highly conserved multi-subunit complex composed  
59 of pigments and proteins which first evolved in cyanobacteria, the progenitor of  
60 chloroplasts (Caffarri et al., 2014). The PSII reaction centre (RC) is made up of D1  
61 and D2 proteins that contain the co-factors required for charge separation, heme *b*<sub>559</sub>  
62 (bound to PsbE and F), and the inner antenna of the core, CP43 and CP47 (Bricker  
63 and Ghanotakis, 1996). The PSII core complex includes the RC plus the oxygen  
64 evolving complex, PsbO, PsbP and PsbQ (Thornton et al., 2004). Additionally, around  
65 20 other low MW proteins are observed in the homodimeric crystal structure and are  
66 required for PSII dimer or supercomplex stability (Caffarri et al., 2009; Umena et al.,  
67 2011). Many more proteins have been found to interact with PSII transiently in  
68 substoichiometric quantities with precise functions to optimize oxygen evolution,  
69 electron transfer, PSII stability, protection or repair. These extrinsic proteins  
70 contribute to the flexibility and stability of PSII during periods of environmental  
71 variation or during biogenesis (Komenda and Sobotka, 2016; Plochinger et al., 2016;  
72 Shi et al., 2012). Efficient PSII regulation and repair is a necessity because PSII  
73 contains chlorophyll excited states that can react with locally produced oxygen.  
74 During repair, the turnover rate of D1 protein can be very high while electron transfer  
75 remains functional: this is achieved by dynamic changes involving the heterogeneity  
76 of PSII complexes (Guenther and Melis, 1990; Jarvi et al., 2015; Kirchhoff, 2019).

77 Large antenna complexes are required to efficiently capture the light energy for  
78 transfer to the PSII core. In all phototrophic eukaryotes, the light harvesting complex  
79 II (LHCII) proteins that are rich in chlorophyll *b* (chl *b*) and account for most of the  
80 pigments associated with PSII perform this role. The LHCII antennae attached to a  
81 PSII core form a PSII supercomplex (PSII SC) and this association can take different  
82 oligomeric forms and is determined by environmental conditions (Bielczynski et al.,  
83 2016; Shen et al., 2019; Su et al., 2017). Regulators LHCSR3 and PsbS, bind to the  
84 antenna of PSII SC and down regulate light harvesting by promoting non-  
85 photochemical quenching (NPQ), a safe dissipation of light energy as heat (Correa-  
86 Galvis et al., 2016a; Correa-Galvis et al., 2016b; Nawrocki et al., 2020; Semchonok  
87 et al., 2017; Tibiletti et al., 2016). State transitions change the functional antenna size  
88 of PSII whereby the phosphorylation status of the LHCII adapts antenna cross  
89 section of both PSI and PSII to the redox state of the electron transport chain  
90 (Dumas et al., 2016). Such quenching and photoprotection mechanisms are  
91 considered to be short-term acclimation processes (Erickson et al., 2015).

92 At the supramolecular level, PSII is embedded in thylakoid membranes of eukaryote  
93 phototrophs. Similar to plants, in unicellular green algae, PSII are mostly found in  
94 more stacked regions of the thylakoids while PSI are found in non-appressed  
95 lamellae and margins (Goodenough et al., 1969; Goodenough and Levine, 1969;  
96 Goodenough and Staehelin, 1971; Kouril et al., 2018). However, PSII is  
97 heterogeneous both in its distribution in the thylakoids and in its supramolecular  
98 organization. PSII SC are found in the grana stacks while PSII core complexes can  
99 also localize to margins and stromal lamellae (Albanese et al., 2016; Boekema et al.,  
100 1999; Danielsson et al., 2006; Drop et al., 2014; Koochak et al., 2019; Schwarz et al.,  
101 2018; Suorsa et al., 2015). These organizations are dynamic and thylakoids adapt  
102 their structure in response to light. In low light, thylakoids form stacks of highly dense  
103 membranes containing PSII SC, a structure favoring light capture (Polukhina et al.,  
104 2016; Rochaix, 2014). PSII forms semi-crystalline ordered arrays (Boekema et al.,  
105 2000) and high molecular mass assemblies containing numerous LHCII and forming  
106 megacomplexes across the stromal gap (Albanese et al., 2017; Albanese et al.,  
107 2016; Boekema et al., 2000; Wei et al., 2016). In high light, thylakoid membranes  
108 become less stacked and the number of layers decreases. This change can be as  
109 fast as a few minutes after the transition from low to high light (Rozak et al., 2002).



110 Destacking of thylakoid membranes is accompanied by PSII antenna size  
111 adjustments and changes to the density of SC, which corresponds to the long-term  
112 acclimated structure in response to the higher light intensity (Bielczynski et al., 2016;  
113 Kouril et al., 2013; Polukhina et al., 2016). Destacking allows for damaged PSII core  
114 complexes to disassemble into PSII core dimers, PSII core monomers and Repair  
115 Complex 47 (RC47: PSII core monomer lacking CP43) and facilitates migration  
116 towards the non-appressed lamellae and grana margins. Changes to stacking and  
117 reduction in antenna size of PSII prevents oxidative stress (Herbstová et al., 2012;  
118 Khatoon et al., 2009) and is also required for PSII repair (Jarvi et al., 2015; Theis and  
119 Schroda, 2016)

120 In eukaryote oxygenic phototrophs, the acclimation response to an increase in light  
121 intensity is defined by three major factors: a decrease in the relative abundance of  
122 thylakoid membrane to stroma, decrease in relative chlorophyll content and an  
123 increase to chlorophyll *a/b* ratio (Melis, 1996). With higher light the requirement for  
124 light harvesting is reduced, while the photosynthetic yield increases in line with  
125 electron transport and CO<sub>2</sub> assimilation rates relative to the lower light intensity  
126 (Anderson et al., 1995). *Acclimation of Photosynthesis to the Environment 1 (ape1)*  
127 allele was initially identified in a screen in *Arabidopsis thaliana* to identify mutants  
128 affected in the long-term light acclimation responses that are linked to increasing  
129 photosynthetic yield (Walters et al., 2003). *Atape1* did not increase PSII quantum  
130 yield after a shift to high light. During acclimation to strong light, the Chl *a/b* ratio  
131 increased in the wildtype, but not in *Atape1*, indicating that the high light response of  
132 increasing PSII core (rich in chl *a*) and decreasing LHClI antenna (rich in chl *b*) was  
133 active in the wildtype but affected in *Atape1* (Walters et al., 2003). This preliminary  
134 characterization pointed to a role for APE1 in an unknown but major light acclimation  
135 mechanism, but neither the mechanism nor the protein was further studied.

136 Using *Chlamydomonas reinhardtii* as a model organism, we present a  
137 characterization of high light acclimation and we demonstrate that the *ape1* mutant  
138 phenotype is deficient in this process. We have determined APE1 localization,  
139 interactions, and function in regulating light capture and photoprotection at the level  
140 of PSII. We propose that APE1 plays a role in the remodeling of PSII SC, thereby  
141 regulating electron transport for CO<sub>2</sub> fixation and preventing PSII photoinhibition.

142

## 143 Results

### 144 ***APE1* maintains photosynthetic growth in high light**

145 In the context of deepening our knowledge on light acclimation processes, we  
146 isolated a mutant in *Chlamydomonas* with poor photosynthetic growth at high light  
147 affected for variable chlorophyll fluorescence under these conditions (Figure  
148 1)(Figure 1A, B, C). Using a PCR-based technique we identified the left-flanking  
149 region of the insertion site of the antibiotic resistance cassette in the 3'UTR of the  
150 *Cre16.g665250* locus, annotated as *Acclimation of Photosynthesis to the*  
151 *Environment 1* (*APE1*, [www.phytozome.jgi.doe.gov](http://www.phytozome.jgi.doe.gov), v12.1.5). Sequencing of the  
152 insertion site showed that 1.5 copies of the *APHVIII* cassette are present (Supp.  
153 Figure 1). RT-PCR of the *Cre16.g665250* locus in this mutant showed presence of  
154 *APE1* transcript, not unexpected for an insertion in the 3'UTR (Figure 1D). This allele  
155 was designated *ape1-1* after successive outcrossings and backcrossings to a wild  
156 type 137cc strain.

157 We also obtained a second allele from the CLiP library (Zhang et al., 2014),  
158 annotated as having an insertion in intron 4 of *Cre16.g665250*, and designated  
159 LMJ.RY0402.039504. The insertion site (Supp. Figure 1) was confirmed by PCR. RT-  
160 PCR analysis revealed no transcript for *APE1* (Figure 1E). The obtained mutation  
161 was successively crossed into our wildtype line and we named this allele *ape1-2*.

162 The two alleles *ape1-1* and *ape1-2* cells grew equally well as the wild type at 5 and  
163  $40 \mu\text{mol}_{\text{photons}}\cdot\text{m}^{-2} \text{ s}^{-1}$  heterotrophically (see TAP in Figure 1A); on the contrary both  
164 *ape1-1* and *ape1-2* showed impaired growth in high light (at  $300 \mu\text{mol}_{\text{photons}}\cdot\text{m}^{-2} \text{ s}^{-1}$ ),  
165 especially on minimal medium (see the dilution series, Figure 1B). Addition of 2%  
166  $\text{CO}_2$  in the growth chamber allowed the mutants to grow like the wild type. These  
167 observations seemed to assign to *APE1* a role in acclimation of oxygenic  
168 photosynthesis in response to light and  $\text{CO}_2$  availability.

169 Complementation of *ape1-2* line using the WT copy of *APE1* under the control of its  
170 native promoter resulted in a complemented line (*ape1-2 c2*) with improved  
171 phototrophic growth in high light compared to the *ape1-2* mutant (Figure 1C).

172 Chlorophyll fluorescence imaging showed that the maximum quantum yield of PSII  
173 ( $F_v/F_M$ ) was very low in the mutant (~ 0.19) but it reached the WT (~ 0.35) value in  
174 the complemented line (~ 0.39).

175 Immunoblot analysis using the antibody against APE1 showed that this protein was  
176 reduced to around 5-10% of the wild type level in *ape1-1*, but it was absent from  
177 *ape1-2* (Figure 1F and G). The APE1 protein accumulation is restored to WT levels in  
178 three independent *ape1-2* complemented lines, which correlates with the improved  
179 growth characteristics (Figure 1C). The complemented line *ape1-2 c2* is referred to  
180 as *ape1-2:APE1* in the experiments below.

### 181 **APE1 is a primordial thylakoid protein**

182 The *APE1* gene model can be identified exclusively in oxygenic phototrophic  
183 organisms (Figure 2)(Figure 2A). APE1 has homologues in all cyanobacteria strains  
184 sequenced, including in *Gloeobacter violaceus* that lacks thylakoid membranes  
185 (Rexroth et al., 2011). It is however not found in any anoxygenic phototrophic  
186 species, bacteria containing only one of either type of reaction center (*Chloroflexus*  
187 *aurantiacus*, RCII or *Heliobacillus mobilis*, RCI). Supplemental Figure 2 shows  
188 representative species used for the hypothetical protein alignment used for the  
189 Cladogram. The predicted gene product shares 34-38% sequence identity with 17  
190 homologs in these oxygenic phototrophs.

191

192 The *APE1* gene of *C. reinhardtii* is predicted to encode a 25 kDa mature protein,  
193 modeled using RaptorX: <http://raptorx.uchicago.edu/> (Kallberg et al., 2012) (Figure  
194 2B) with two hydrophobic helices on the N-terminus (predicted as transmembrane  
195 helices by TMPred) and a soluble domain of unknown function (Domain of Unknown  
196 Function 2854) which constitutes the majority of the protein and is unique to APE1  
197 (Supplemental Figure 2). The *C. reinhardtii* APE1 has a predicted chloroplast transit  
198 peptide of 41 amino acids (predicted by PredAlgo, [giavap.genomes.ibpc.fr](http://giavap.genomes.ibpc.fr)).

199 The APE1 antibody was used to determine APE1 protein localization. APE1 is  
200 present in the chloroplast, in the isolated thylakoid fraction, shown by immunoblot  
201 analysis. APE1 was present with thylakoid PSAD, while it was absent in the stromal

202 fraction, where Rubisco accumulated (Figure 2C). APE1 is thus a chloroplast  
203 thylakoid protein with origins at the beginning of oxygenic photosynthesis.

204 **APE1 contributes to the accumulation of PSII proteins and LHCII antenna but is**  
205 **not required for biogenesis**

206

207 To quantify possible differences in the accumulation of PS proteins, we analysed  
208 thylakoid proteins isolated from WT and *ape1-2* grown in low light heterotrophically.  
209 Proteins were separated using gradient denaturing gels and resolved using the highly  
210 sensitive SYPRO staining technique (Figure 3). Immunoblot analysis shows that  
211 APE1 cannot be separated from LHCII in this analysis (Figure 3A). PSII proteins D1  
212 and D2 were quantified using Image J and found to accumulate less than the WT  
213 while LHCII proteins accumulate more than the WT (by approximately 20% in both  
214 cases). Other core and minor antenna appeared unaffected using this technique  
215 (Figure 3A). Immunoblot analysis shown for *ape1-1* grown phototrophically at low  
216 light ( $80 \mu\text{mol}_{\text{photons}}\cdot\text{m}^{-2}\cdot\text{s}^{-1}$ ) showed a similarly reduced PSII content for D1 and here  
217 the other PSII proteins tested were also reduced when compared against the wild  
218 type (Figure 3B). The accumulation of major photosynthetic complexes did not show  
219 major differences when respective protein content was compared. Photosynthetic  
220 parameters for cells grown under these conditions showed that the quantum yield of  
221 PSII was not significantly different in *ape1* from the control strains (Supp. Table 1).

222

223 When multi-subunits chloroplast complexes are not properly assembled, they are  
224 degraded, and when a dominant subunit of a complex is missing, the synthesis rate  
225 of the other subunits is reduced by the mechanism of “control by epistasy of  
226 synthesis” (Choquet et al., 2001). In *ape1-1*, APE1 barely accumulates (Figure 3C).  
227 In mutants devoid of PSII (*psbA*) and PSI (*psaB*), grown heterotrophically, APE1  
228 content was similar to the wild type. These results show that APE1 is not an intrinsic  
229 subunit of the photosystems and is not strictly required for their assembly.

230

231 The accumulation of the APE1 protein was also tested in both low and high light  
232 phototrophic culture conditions (Figure 3D). APE1 was quantified and found to  
233 accumulate to the same amount in both conditions. However as opposed to  
234 accumulation of APE1 in Figures 1, 2 and 3C showing protein samples from

235 heterotrophically grown cells in low light, in figure 3D, APE1 migrates not as one  
236 band but as two bands and they accumulate in different quantities between low and  
237 high light phototrophic conditions. Taken together these results show that APE1  
238 protein accumulates constitutively and may also be modified post-translationally  
239 depending on the media or the light intensity.

#### 240 **APE1 interacts with PSII core complexes**

241 The sequence analysis of APE1 and the low PSII quantum yield of *ape1* in high light  
242 suggested a functional link to PSII activity and we next performed experiments to  
243 identify protein-protein interactions with native photosynthetic complexes. Mild  
244 solubilization of purified thylakoid membranes with 0.5% digitonin/ 0.5%  $\alpha$ -DM  
245 followed by separation of protein complexes by BN PAGE (4-16%) was followed by  
246 immunoblot analysis of D1 and PsaD to identify PSII and PSI complexes. It gave five  
247 bands for PSII: two SC forms, of which one also contains PSI, the PSII core dimers,  
248 the PSII core monomers and RC47 (PSII Reaction Center with CP47 but without  
249 CP43). Four bands of varying intensity were identified for PSI (Figure 4).

250 Immunoblot with APE1 antibody did not show any cross-immunoreaction against  
251 thylakoid proteins other than APE1 (see *ape1-2* lane, Figure 4B). APE1 migrated  
252 mostly with the higher molecular mass fractions (megacomplexes, aggregates or  
253 non-solubilized membrane fragments) as well as the low molecular weight fraction. In  
254 between these two extremes, defined bands were obtained at the same level of D1,  
255 showing that APE1 co-migrated with PSII SC, PSII dimers and monomers, but not  
256 the PSII repair fraction, RC47. Neither, did APE1 co-migrate with the trimeric antenna  
257 fraction. In BN PAGE (4-16%) there were at least two bands where PSI and PSII co-  
258 migrate or migrate very closely to each other.

259 Therefore, we tested for APE1 accumulation in complexes from mutants devoid of  
260 PSI ( $\Delta PsaB$ ) or PSII ( $\Delta PsbA$ ) and using BN PAGE (3-12%) and silver-stained 2D  
261 gels (Figure 5)(Supplemental figure 3). As in Figure 4B, APE1 was found below and  
262 above LHCII trimers, probably as aggregates. In  $\Delta PsaB$ , APE1 was detected in two  
263 specific bands, PSII core monomers and dimers that are absent from the  $\Delta PsbA$   
264 lane. This result unambiguously shows that APE1 co-migrates with the PSII core,  
265 with monomers and dimers.

266 To prove an interaction with PSII, protein crosslinking was tested using  
267 glutaraldehyde (GA) (Figure 6). Thylakoid membranes were solubilized in 1%  $\alpha$ -DM  
268 and 1% Digitonin and loaded on sucrose gradients, with or without GA and subjected  
269 to ultracentrifugation. The sedimentation profile was not significantly changed  
270 whether the crosslinking agent was added or not (see Figure 6A), showing that,  
271 under these conditions, GA did not affect the fractionation into SC. Seven bands  
272 were collected and their absorbance was measured to control the content in  
273 photosynthetic complexes. All of the B5-B8 fractions contained PSII, the B5 fraction  
274 peaked at 675 nm with low emission for chl *b* region 630-660 nm, so we identify this  
275 as a fraction enriched in PSII core dimers. For B8 there is a relative increase in  
276 intensity around 630-660nm that we identified as LHCII of PSII SC (Figure 6B). The  
277 different fractions were then analyzed by denaturing SDS-PAGE. Except B1 (free  
278 pigments and small polypeptides) all fractions contained LHCII polypeptides,  
279 LhcbM1-8, (Drop et al., 2014) migrating between 25 and 30 kDa whether the cross-  
280 linking agent was present or not (this can be seen by comparing B7- and B7+ in  
281 Figure 6C). This shows that GA added to the gradient did not unspecifically cross-link  
282 all proteins into complexes, as also observed in the original protocol that was  
283 developed to strongly limit intercomplex crosslinking (Stark, 2010). B2+ and B3+  
284 fractions did not contain high MW polypeptides whereas B5+ to B8+ contained large  
285 amounts of cross-linked polypeptides in the top part of the gel.

286 The immunoblot of the SDS-PAGE gel decorated with APE1 antibody in figure 6D  
287 shows that all cross-linked bands containing PSII (B5+ to B8+) contained the APE1  
288 polypeptide in the upper part of the gel. B5+ lane showed a specific cross-linking of  
289 APE1 with the PSII core and only in the high MW part of the gel while it appeared as  
290 a single polypeptide in the non-treated thylakoid samples (Thk). APE1 does not  
291 migrate alone or in aggregates when the crosslinker is added showing that when  
292 protein-protein interactions are stabilized with GA, APE1 is indeed a PSII protein and  
293 not a free protein in the membrane.

#### 294 **PSII is more prone to photoinhibition in *ape1***

295 Light sensitivity and a decreased maximum quantum efficiency of PSII in high light  
296 were observed in *ape1-2* (Figure 1 and Photosynthetic parameters in Supplemental



297 Table 1), this appeared to be photoinhibition of PSII and defined as destruction of  
298 PSII centers occurring at a faster rate than they can be repaired (Adir et al., 2003). To  
299 determine whether lower PSII activity in the mutant was due to faster photodamage  
300 or due to impaired PSII repair and/or *de novo* synthesis, we applied a photoinhibitory  
301 light treatment of  $1800 \mu\text{mol}_{\text{photons}}\cdot\text{m}^{-2}\cdot\text{s}^{-1}$  for one hour, with recovery in low light  
302 (Figure 7). PSII maximum quantum efficiency and D1 accumulation were monitored  
303 (Figure 7A and B). To differentiate between PSII degradation rate and PSII synthesis  
304 rate we also performed the experiment in the presence of protein translation  
305 inhibitors (lincomycin, LC and chloramphenicol, CAP).

306 As expected, the presence of translation inhibitors (+LC/CAP) prevented the recovery  
307 of  $F_V/F_M$  after photoinhibition (1 to 4 hours in Figure 7A). This was due to the block of  
308 PSII turnover and D1 synthesis, observed as a decrease in D1 accumulation in the  
309 bottom panel of Figure 7B. In the absence of translation inhibitors (-LC/CAP), a  
310 smaller decrease in D1 content was observed after an hour (Figure 7B), suggesting  
311 that in this instance D1 synthesis partially compensated D1 degradation. The same  
312 was also observed on the amplitude of  $F_V/F_M$ , consistently greater at 1 hour, showing  
313 that PSII was turning over in -LC/CAP conditions (Figure 7A).

314 The decrease in photosynthetic parameters ( $F_V/F_M$ ) was paralleled by a decrease in  
315 D1, more pronounced in the mutant than in the reference strains (Figure 7B). Since  
316 the recovery rate in the mutant was similar to that of the wild type and complemented  
317 strain, decrease of D1 in *ape1-2* cells was more due to a faster PSII photoinhibition  
318 than a slower PSII repair.

319 The detoxification enzyme, Glutathione Peroxidase 5 (GPX5) is a marker for singlet  
320 oxygen and PSII dysfunction (Fischer et al., 2009; Roach et al., 2017). GPX5 levels  
321 were higher in the mutant already in low light, and its content increased after the  
322 photoinhibitory treatment (Figure 7B). This result suggests that a lack of APE1  
323 causes ROS production that elicits a systemic response that we witness by GPX5  
324 accumulation in the mutant, and that the ROS produced is likely to be singlet oxygen  
325 issue of PSII.

326 We next examined the formation of high molecular mass complexes after a high light  
327 treatment. We tested different detergent concentrations and found that the dose did

328 not significantly change the fractionation of complexes which remained stable for  
329 each strain (Figure 7C). Notably, the absence or presence of APE1 had a major  
330 impact on the pattern of high molecular mass complexes (A-F in Figure 7 and  
331 supplemental figure 4). The heaviest band, A, that appears blue and of greater  
332 abundance in *ape1-2* is composed of PSII SC, PSI and mitochondrial  
333 H<sup>+</sup>ATP synthase (the latter is a contaminant from the thylakoid isolation common in  
334 cells grown under these conditions (Rexroth et al., 2003)). The bands B-E are more  
335 delineated but less green, suggesting bleaching, compared to the controls. The PSI  
336 band, F, is less abundant, suggesting a shift to a higher molecular mass band A in  
337 comparison to controls. Importantly, under these conditions, *ape1-2* retains PSII  
338 dimeric cores but is lacking the PSII monomeric core and RC47 complexes with an  
339 absence of CP43, CP47, D1 and D2 proteins at the expected position in the 2D gel  
340 (Supplemental Figure 4).

#### 341 **PSII antenna size, heterogeneity ( $\alpha$ - and $\beta$ -centers) and connectivity between** 342 **PSII centres**

343 Differences in PSII photoinhibition linked to changes to PSII SC observed in BN-  
344 PAGE (Figure 7) led us to test *in vivo* the effective antennae size of PSII in *ape1*  
345 under physiological conditions. During a pulse of saturating light  $Q_A$  reduction rate is  
346 faster than  $Q_A$  to  $Q_B$  electron transfer and the variable chlorophyll *a* fluorescence  
347 increases from  $F_0$  to  $F_M$  and is commonly referred to as an OJIP induction. The first  
348 phase of this fluorescence rise (OJ phase ~1 ms) reflects PSII antenna size, the  
349 faster the rise the larger the functional antenna size (Dinc et al., 2012) (Figure 8). We  
350 used a similar treatment as to that shown for the photoinhibition experiment (Figure  
351 7A) and found that *ape1-2* PSII antenna size was slightly increased in comparison to  
352 the controls for conditions (i) and (iii) (Table I and Figure 8A). This suggests that  
353 *ape1-2* tends towards a larger PSII antenna than both the control lines becoming  
354 significantly different after the high light treatment (Table I).

355  
356 We questioned whether APE1 was affecting the excitonic connectivity of PSII  
357 centres, following the method of (Cuni et al., 2004). There were only small  
358 differences in the connectivity parameter *J* between *ape1-2* and WT prior to light  
359 treatment (i) ( $J_{wt} = 3.2 \pm 0.3$  and  $J_{ape1-2} = 4.1 \pm 0.5$ ) and after recovery from the light  
360 treatment (iii) ( $J_{wt} = 3.1 \pm 0.2$  and  $J_{ape1-2} = 3.8 \pm 0.4$ ). A significant deviation was



361 observed at the light treatment (ii) in both strains ( $J_{wt} = 1.4 \pm 0.1$  and  $J_{ape1-2} = 1.5 \pm 0.1$ ).  
362 This may be due to a smaller fraction of active PSII. During photoinhibition, the  
363 inactivation of PSII decreases the number of exciton traps as well as the probability  
364 of an exciton to hop from center to center. An absence of APE1 did not have an affect  
365 on this outcome.

366  
367 Heterogeneity of PSII antennae was also tested in the presence of DCMU under non-  
368 saturating light. Under such conditions, the fluorescence rise is multiphasic. Analysis  
369 according to (Melis and Homann, 1976) showed that two phases are observed, one  
370 representing the  $\alpha$ -centres or large antenna PSII and the other  $\beta$ , or low antenna  
371 PSII; no significant differences were observed for conditions (i) but in condition (iii),  
372 *ape1-2* had a larger amplitude of the fast phase  $\alpha$  (~55%) than the control lines  
373 (~42%) suggesting a greater proportion of large antenna PSII SC (Figure 8B).

374  
375 **APE1 changes fractionation profiles of PSII SC during light acclimation**

376 To further characterize the different PSII SC partitioning, *ape1-2* and wild type were  
377 grown phototrophically in low and high light at ambient CO<sub>2</sub> in turbidostats.  
378 Photosynthetic parameters were monitored (Supplemental table 1). At both light  
379 regimes, samples were collected after an acclimated state was reached (around 4  
380 days). Using these conditions, six bands could be identified that contained PSII: PSII  
381 SC III, PSII SC II, a band containing PSII and PSI (PSII SC I/PSI), PSII core dimers,  
382 PSII core, and RC47 (Figure 9)(labeled in Figure 9A and 9C); and 5 containing PSI  
383 (Identified in Supplemental Figure 4).

384 In low light conditions, in the wild type, PSII was mostly identified as dimeric and  
385 monomeric core complexes (Image J relative quantification of D1 from the  
386 immunoblot measured: 23% PSII SC; 37% dimeric and 37% monomeric cores; 3%  
387 RC47) (Figures 9A and 9C). The *ape1-2* profile was different; PSII SC were more  
388 highly represented, observed by D1 signal in the western blot (ImageJ relative  
389 quantification of D1 from the immunoblot measured 55% PSII SC; 22% dimeric and  
390 22% monomeric cores; 1% RC47). The PSI profile was also different in *ape1-2*, with  
391 a higher abundance of higher molecular mass forms. These features regarding both  
392 PSII and PSI confirmed what was observed using milder solubilization.

393 The high light acclimation treatment (Figure 9B and 9D and silver stained gels in  
394 Supplemental Figure 4) resulted in changes to the PSII organization profile in the wild  
395 type. The ratio of high to low molecular mass assemblies decreased, where the  
396 signal for PSII SC, PSII SC I/PSI and PSII core dimers diminished in favor of PSII  
397 core monomers. PSI organization was also changed, with a reduction in the high MW  
398 bands. In *ape1-2*, the profile of PSII was less flexible: the same forms of PSII, from  
399 RC47 until PSII SC II, were still detectable. This led to a higher ratio of PSII SC to  
400 PSII core monomers in the absence of APE1 (Figure 9). Interestingly and despite  
401 significant photoinhibition of *ape1-2*, CO<sub>2</sub> fixation was not affected in comparison to  
402 the control strains (Supplemental table I).

### 403 **Thylakoid structure is altered in *ape1***

404 Thylakoid membrane structure is determined by a number of factors including  
405 photosystem composition, distribution, LHCII interactions and modifications  
406 (Kirchhoff, 2019). Interaction of APE1 with PS II, and changes in photosystem  
407 oligomeric composition could be linked to modifications at the level of the thylakoid  
408 membrane. To verify this, *ape1-2* and wild type cells were grown in phototrophic  
409 conditions in low light and ambient CO<sub>2</sub> and the thylakoid membranes were resolved  
410 by transmission electron microscopy (Figure 10).

411 The wild type appeared to have more organized thylakoid membranes as opposed to  
412 *ape1-2*, where thylakoids showed disorganized or uneven margins (Figures 10A and  
413 B and Supplemental Figure 5). Quantitative analysis (Figure 10C) showed that the  
414 mutant thylakoid stacks had more layers, often more than 7; against 3 - 4 on average  
415 in the wild type (Figure 10D). *ape1-2* stacks were shorter, always less than 1 μm,  
416 while the wild type showed membranes appressed over > 1 μm (Figure 10E).  
417 Statistical analysis showed that the differences observed were significant.

418 Calculation using the parameters found in Figure 10C and in (Engel et al., 2015)  
419 showed that the *ape1-2* mutant shows a 50% increase in the ratio of grana height to  
420 diameter compared to the wild type, and a 40% increase in the area of appressed to  
421 unappressed membranes (Supplemental Table 2). This is due to a larger stacked  
422 area and to a decreased end membrane surface, even though the area of the  
423 margins is about 20% higher in the mutant.

424 Differential solubilization of thylakoids of the wild type and *ape1-2* was performed to  
425 correlate changes in thylakoid structure with the localization of the photosystems  
426 (Figures 10F and 10G). We used digitonin to preferentially solubilize end  
427 membranes/stroma lamellae of thylakoids and then solubilized the remaining pellet  
428 (assumedly mostly stacked regions/grana) with  $\beta$ -DM and these were separated by  
429 BN PAGE (4-16%). We observed a lower yield on a per chlorophyll basis for digitonin  
430 solubilization in *ape1-2*, suggesting less LHCII (red arrow) and a reduction in low  
431 molecular mass PSII (black arrow), expected to accumulate preferentially in the end  
432 membranes and stromal lamellae regions as seen in the wild type (Figure 10F). The  
433 subsequent treatment of *ape1-2* with  $\beta$ -DM showed enrichment in high molecular  
434 mass oligomeric forms of PSII (black arrows), in the more stacked regions of the  
435 membranes (Figure 10G).

## 436 Discussion

437 Structure and function of the photosystems and their arrangement in the thylakoid  
438 membrane are constantly adjusting to changes in their environment allowing them to  
439 maintain performance and to cope with stress. Modulating PS II oligomeric  
440 composition and antenna size in response to high light is a key parameter for light  
441 acclimation. The sum of acclimation mechanisms that an organism has at its disposal  
442 contributes to the fitness of a species and understanding these is fundamental to our  
443 comprehension of ecology and evolution, and to the future improvement of CO<sub>2</sub>  
444 capture and utilization by photosynthetic organisms.

445

446 Proteomic studies in *Chlamydomonas* (Terashima et al., 2011), maize (Majeran et al.,  
447 2008) and *Arabidopsis* (Myouga et al., 2018; Tomizioli et al., 2014) have listed APE1  
448 amongst the peptides found in thylakoid membranes. Western blot analysis on  
449 fractionated chloroplasts demonstrated that APE1 is an integral membrane protein,  
450 bound to the thylakoids (Figure 2). APE1 belongs to the GreenCut, the pool of gene  
451 models conserved across plants and green algae and this protein is absent from non-  
452 photosynthetic organisms (Merchant et al., 2007). More specifically, APE1 is part of  
453 the 'PlastidCut + cyanobacteria' (Heinrich and Grossman, 2013). Comparative  
454 genomics of cyanobacteria showed that APE1 is part of their core genome,  
455 encompassing only 63 gene models shared with all oxygenic photosynthetic  
456 organisms (Mulikdjanian et al., 2006). The other conserved regulatory proteins in this

457 group include GUN4 and THF1. A more recent analysis (Beck et al., 2018) compared  
458 the genome of 77 cyanobacterial species including the oceanic nitrogen-fixing  
459 cyanobacterium UCYN-A and *cyanobacterium endosymbiont of Epithemia turgida*  
460 *EtS* that have lost PSII and the genes for carbon fixation (Zehr et al., 2008). From the  
461 cross analysis of these different data sets we identified co-occurrence of APE1 with 7  
462 PSII core subunits, that is, at the origins of oxygenic photosynthesis (Supplemental  
463 Table 3). This very early conservation may suggest that we have identified APE1 in  
464 the regulatory role that permits PSII heterogeneity and increases fitness and flexibility  
465 of the photosynthetic apparatus across all oxygenic photosynthetic species.  
466 However, the *ape1* phenotype is only observed under high light that suggests it  
467 became less important during evolution, as the repertoire of PSII repair and  
468 regulatory pathways has expanded over time. Rather than being a sole regulator it is  
469 probably now integral to a set of pathways involved in light acclimation (such proteins  
470 as CURT and STT7/8 could be considered to fall within the same category) that  
471 together optimize thylakoid structures in line with light conditions (Pribil et al., 2014;  
472 Pribil et al., 2018).

473 *Chlamydomonas ape1* mutants show an increased light sensitivity compared to WT,  
474 due to the ROS formation as indicated by increase in GPX5 (Figure 7, (Fischer et al.,  
475 2009; Roach et al., 2017)). The increase in ROS, more specifically  $^1\text{O}_2$ , results from  
476 destabilized PSII/impaired acclimation but this phenotype is alleviated under high  
477  $\text{CO}_2$  conditions (Figure 1). It appears as a common trait that when a regulatory  
478 pathway is missing, affecting either light-harvesting, electron transport or  $\text{CO}_2$   
479 capture, that growth is retarded under restrictive conditions (rather high light  
480  $>300 \mu\text{mol}_{\text{photons}}\cdot\text{m}^{-2}\cdot\text{s}^{-1}$ , limiting  $\text{CO}_2$ ) while more permissive conditions (either  
481 moderate light  $<100 \mu\text{mol}_{\text{photons}}\cdot\text{m}^{-2}\cdot\text{s}^{-1}$  or high  $\text{CO}_2$ ) restore normal growth. Other  
482 defects in regulation of photosynthesis have similar consequences on phototrophic  
483 growth: *pgr5* in *C. reinhardtii* and *Arabidopsis* (Johnson et al., 2014; Munekage et al.,  
484 2008), *pgr11* (Dang et al., 2014), *cas* (Wang et al., 2016), *psbS* (Correa-Galvis et al.,  
485 2016b), *npq4* (Chaux et al., 2017), as well as 1 in 5 mutants annotated as *acetate*  
486 *requiring* in (Dent et al., 2005). Under limiting  $\text{CO}_2$ , linear electron flow is limited at  
487 the PSI acceptor-side and in green algae  $\text{O}_2$  is also used as an alternative electron  
488 acceptor to relieve acute reduction of electron carriers through the Flv Pathway  
489 (Chaux et al., 2015) or through the shuttle of reduced metabolites to the

490 mitochondrion for oxidative phosphorylation (Dang et al., 2014; Larosa et al., 2018).  
491 Whereas O<sub>2</sub> photoreduction mostly damages PSI as observed in mutants impaired  
492 for cyclic electron flow (Johnson et al., 2014), an absence of APE1 results in PSII  
493 photodamage (Figure 1, 7 and Supplemental table 1).

494  
495 The biophysical assay of antenna size,  $\alpha$ - and  $\beta$ -centers and connectivity (Figure 8)  
496 confirmed that despite changes to supramolecular membrane organization that affect  
497 effective antenna size, the functional interaction between PSII units (the connectivity  
498 experiment to measure excitonic coupling) were not affected between *ape1* and the  
499 wild type. This suggests again for APE1 a regulatory role rather than at the level of  
500 the PSII function. Similarly, APE1 is not required for PSII biogenesis (Figure 3).  
501 Neither did we find it to be directly involved in PSII repair or *de novo* synthesis  
502 (Figure 7). Instead, an accelerated degradation of D1 protein as well as an increased  
503 accumulation of GPX5 were observed in *ape1* (Figure 7) and both these effects are  
504 linked to singlet oxygen production at the level of PSII. PSII photoinhibition increases  
505 linearly with light intensity (Tyystjarvi and Aro, 1996) and ROS production in isolated  
506 thylakoids in vitro is dependent on membrane stacking (Khatoun et al., 2009). Thus,  
507 the light sensitivity and PSII photoinhibition observed in *ape1* is correlated to the  
508 retention of PSII SC and the greater number of appressed membranes (Figure 7C  
509 and 10). The *ape1* mutant has a reduction in PSII core monomers and RC47 when  
510 grown phototrophically in low light (Figure 4) more likely due to the remodeling of PSII  
511 cores into SC and not simply due to a deficient PSII repair cycle. However, as PSII  
512 heterogeneity is important for repair, it is clear that there is some overlap between  
513 these two processes. The lack of coordination between PSII core and antenna under  
514 non-stressful conditions, that results in suboptimal accumulation of PSII core  
515 proteins, D1 and D2 (-20%) and an increase in total LHCII antenna (+20%) (Figure 3)  
516 suggests that APE1 has a constitutive function in maintenance of PSII, in line with a  
517 regulatory role in light acclimation.

518  
519 When PSII is photodamaged, D1 requires repair and the first step is the disassembly  
520 of PSII SC to core monomers followed by unfolding of thylakoid membranes (Lu,  
521 2016; Theis and Schroda, 2016). Psb29 / Thylakoid Formation 1 (THF1) is involved  
522 in this disassembly process via interaction with the FtsH protease and LHCII antenna

523 (Bec Kova et al., 2017; Huang et al., 2013). In our model, APE1 responds to an  
524 increase in light by releasing the oligomeric structure of PSII SC, prior to the  
525 disassembly of PSII megacomplexes by THF1 and FtsH protease for PSII repair  
526 illustrated by the model (Figure 11). APE1 binds to PSII core and not LHCII, perhaps  
527 preferentially accumulated in stromal lamellae and margins of stacked regions as  
528 measured in (Tomizioli et al., 2014). When in PSII SC, it releases core complexes as  
529 dimers and monomers. As a consequence, PSII heterogeneity influences the  
530 stacking of *Chlamydomonas* thylakoids, promoting longer and less stacked  
531 membranes with an increased volume of end membranes.

532

533 Worth commenting on is the effect on PSI complexes observed in *ape1-2* (Figures  
534 4,7 and 9). After ruling out an interaction with PSI (Figure 5) we propose that the  
535 more compact and more stacked membranes in *ape1-2* compared to the wild type  
536 likely result in greater stability and fractionation of the higher molecular mass PSI-  
537 LHCA complexes. This was similarly observed in the *PsbN* mutant, a *bona fide* PSII  
538 repair protein, with as a consequence disrupted thylakoids, that accumulates higher  
539 order PSI complexes (Torabi et al., 2014).

540 During high light acclimation in plants, it takes up to 2 days for the antenna proteins  
541 to be degraded. Yang and co-workers (Yang et al., 1998) found that none of the  
542 known chloroplast proteases were involved in this process. This suggests the  
543 existence of a new unknown process in the degradation of antennae that could be  
544 autophagy. In a study of ATI1t (Autophagy-related 8 interacting protein 1) using split  
545 ubiquitin and BiFC assays (Michaeli et al., 2014), ATL1 was shown to interact with 13  
546 chloroplast proteins including APE1 and PsbS. The exact interpretation of this result  
547 is unclear, but it could suggest that photoprotection proteins, which are necessary  
548 under stress conditions, are resistant to proteases and are only targeted for  
549 degradation under conditions where cell death is impending. It could also point to a  
550 more complex role for APE1 and PsbS as markers for selective high light acclimation  
551 as vesicle cargo for plastid remodeling (Baena-Gonzalez and Sheen, 2008; Khan et  
552 al., 2013).

553



554 Very few specific regulators have been directly attributed to the light acclimation  
555 process since it was first described in Björkman's pioneering work (Björkman and  
556 Ludlow, 1972). Photosystem and antenna remodeling in response to light intensity  
557 characterized there and in later studies (Anderson et al., 1988; Melis, 1991) is  
558 coherent with what is witnessed in the *ape1* mutant phenotype of both  
559 Chlamydomonas and Arabidopsis (Walters et al., 2003). We envisage two  
560 possibilities for a mode of action: (1) Via an interaction with the PSII core, APE1 may  
561 destabilize the density packing of thylakoids by impairing hydrophobic interactions  
562 between transmembrane helices. (2) APE1 contains a soluble domain, with highly  
563 conserved charged residues (Glu, Asp, Arg, His) (shown in Supplementary Figure 2)  
564 which may bind, release or sense a substrate that changes electrostatic or Van der  
565 Waals attraction between polypeptides across the stromal gap. We predict that APE1  
566 may only be involved in a very initial stage of the light acclimation process whereby it  
567 responds to light by enabling PSII SC to disassemble promoting PSII core complex  
568 heterogeneity and thylakoid destacking. Only under high light conditions, in  
569 Chlamydomonas, does this process become critical for survival.

570

## 571 **Materials and Methods**

572 **Strains.** The wild type strain (Jex4 *mt*) used in this study is a progeny of 137c  
573 backcrosses. *ΔrbcL 2A mt* strain used as the recipient strain for generation of the  
574 mutant library comes from a backcross of *ΔrbcL* strain (Johnson et al., 2010) and  
575 described as the "control" strain in figure 1. *ΔrbcL 2A mt*- strain was transformed with  
576 the *aphVIII* cassette obtained by digestion with SacI and KpnI of the pBC1 plasmid  
577 derived from pSI103 (Sizova et al., 2001). Cells were plated on TAP containing 15  
578  $\mu\text{g}\cdot\text{mL}^{-1}$  Paromomycin. *ape1-1* strain is the progeny of *ΔrbcL ape1* obtained in the  
579 generated mutant library, outcrossed to Jex4 *mt*+ twice. *ape1-2* strain is the progeny  
580 of two outcrosses of strain LMJ.RY0402.039504 from CliP (Li et al., 2016) with Jex4  
581 *mt*+ and *mt*. Complemented strains were generated as described in "Transformation"  
582 using the vector obtained as described in "vector construction for nuclear  
583 complementation" below. *psbA* and *psaB* are the Fud7 and C3 mutants, a gift from  
584 F.A. Wollman.

585

586 **Cell culture.** Cell cultures were grown in Tris-Acetate-Phosphate medium at 25°C  
587 under ambient air at  $10 \mu\text{mol}_{\text{photons}}\cdot\text{m}^{-2} \text{ s}^{-1}$  in incubation shakers, this is referred to as  
588 heterotrophic conditions in the text, and when stated, shifted to phototrophic  
589 conditions by centrifugation and resuspension in minimal media under ambient air.  
590 Cells were always kept at exponential phase by daily dilution to a density of around  
591  $1\text{-}2\cdot 10^6 \text{ cells}\cdot\text{mL}^{-1}$ . Experiments performed using batch culture were done in 250 or  
592 500 mL Erlenmeyer flasks. Standard recipes were used as in (Harris, 1989).  
593 Maintained cultures were always cultivated at  $< 10 \mu\text{mol}_{\text{photons}}\cdot\text{m}^{-2} \text{ s}^{-1}$  in solid TAP  
594 media.

595  
596 **Turbidostats.** Photobioreactors were run as turbidostats ( $\text{OD}_{880}$  maintained at 0.4 by  
597 addition of fresh minimal medium). Set-up was the same as in (Chaux et al., 2017),  
598 except that the  $\text{CO}_2$  input was maintained constant at ambient level (correction to  
599 avoid natural daily  $\text{CO}_2$  variation). Light conditions used were 40 and 320  
600  $\mu\text{mol}_{\text{photons}}\cdot\text{m}^{-2}\cdot\text{s}^{-1}$ . Samples were taken by pressurizing the culture tank, for  
601 microscopy analysis, BN-PAGE, pigment content, and photosynthetic parameters.  
602 Wild type and *ape1-2* cells were grown in triplicates in photobioreactors in low light  
603 until their growth in these conditions stabilized, we called this an “acclimated state”.  
604 We took samples of these cultures for detailed biochemical analysis. Cells that had  
605 reached an acclimated state at low light were then subjected to high light, saturating  
606 for photosynthesis. Again, we allowed the growth rates of the cells to stabilize (about  
607 5 days) before sampling the cultures.

608  
609 **DNA extraction.** DNA extraction was performed either according to a phenol-  
610 chloroform method or according to a rapid total DNA extraction with Chelex 100  
611 (Sigma).

612  
613 **RESDA-PCR adapted from** (Gonzalez-Ballester et al., 2005). First amplification was  
614 done in 20  $\mu\text{L}$  with DegPstI (degenerated primers) and Rb1 (on the *aphVIII* cassette)  
615 primers with Taq polymerase (NEB) using 58°C annealing temperature for 5 cycles,  
616 \*25°C and then 55°C for 1 cycle, 58°C for 2 cycles, 40°C for 1 cycle\*, repeated 20  
617 times between \*. The PCR mix was then diluted 1000 times and 1  $\mu\text{L}$  used as matrix  
618 for the second amplification. The latter was done using KOD Xtreme polymerase  
619 (Novagen) with Q0 (on an adaptator on DegPstI primer) and Rb4 (on the cassette),



620 using 60°C annealing temperature for 32 cycles. Fragments were loaded on 1%  
621 agarose gels, the band of interest excised from the gel and cleaned using Macherey-  
622 Nagel™ NucleoSpin™ Gel and PCR Clean-up Kit and cloned into pGEM-T  
623 (Promega) for amplification before sequencing.

624  
625 **Genome mapping.** *ΔrbcL ape1* full insertion site in *APE1* was amplified from phenol-  
626 chloroform extracted DNA using primer A (5'- CATAACCCAGACCCCCAGAG-3') and  
627 B (5'-CAGACTCATCCGGACCCCAA-3') on genomic DNA, from either side of the  
628 insertion, using LA-Taq (Thermo Scientific, 60°C, 30 cycles). LMJ.RY0402.039504  
629 was subcloned, and DNA extracted using the Chelex 100 method. The 3' side of the  
630 insertion was amplified using primer D (5'-GACGTTACAGCACACCCTTG-3') on the  
631 cassette and C (5'-ATCTCTTTTCGGGTCCATCCT-3') primer 600 bp upstream on  
632 genomic DNA (LA-Taq, 60°C, 30 cycles).

633  
634 **RT-PCR.** Cells were grown in TAP low light conditions. RNA was isolated using the  
635 PureLink RNA reagent from Invitrogen according to the manufacturer instructions,  
636 treated by TURBO DNase enzyme (Applied Biosystems) and purified with  
637 NucleoSpin RNA Clean-up kit (Macherey-Nagel). RNA was quantified by Nanodrop  
638 (Thermoscientific). cDNA was synthesised using the standard SuperScript III protocol  
639 (Invitrogen) with oligo-dT primers. cDNA was amplified by PCR using the  
640 housekeeping gene, *RAK* as positive control and using primers E (5'-  
641 ACCTATCCTCGCTGTTCTTG-3') and F (5'-CACGTCCTTCTTGTCCTTGC-3') for  
642 *APE1* for 30 cycles.

643  
644 **Genetic transformation.** 300 μL of cell culture resuspended at around  $1-2 \cdot 10^8$   
645 cells.mL<sup>-1</sup> in TAP 60 mM Sucrose were aliquoted in 0.4 cm gapped cuvettes. 1 μg of  
646 linearized DNA and 4 μL of salmon sperm DNA were added and cells were incubated  
647 20 min on ice. Negative controls were done without adding DNA. Electroporation  
648 conditions were 1000 V, 25 μF. Cells were allowed to recover in low light overnight in  
649 10 mL TAP 60 mM Sucrose, centrifuged and resuspended in 500 μL TAP. Volumes  
650 from 50 μL to 200 μL were plated on TAP containing antibiotics to obtain an optimal  
651 colony density. The *ape1-2* mutant was transformed with a plasmid containing Zeo<sup>R</sup>  
652 cassette and the genomic version of the wild type *APE1* under its native promoter

653 (1500 bp upstream of the start site of *APE1*). Transformants were selected on  
654 zeocin-containing plates and were screened using chlorophyll fluorescence imaging  
655

656 **Vector construction for nuclear complementation.** Transformation plasmid was  
657 constructed using restriction site cloning in pMS188 (Schroda et al., 2002) containing  
658 a bleomycin resistance cassette. *APE1* gene with an additional 1500 bp on the 5'  
659 side and 500 bp on the 3' side was amplified by PCR using Q5 High-Fidelity DNA  
660 Polymerase (NEB) using primers 5'-TTATAATACCCACCCGTCAAAGCTGTG-3' and  
661 5'-TTATAACAGACTCATCCGGACCCCAA-3' containing an additional Psil restriction  
662 site (70°C, 30 cycles). pMS188 was digested using Psil and dephosphorylated.  
663 Ligation was done in 20 µL overnight at 4°C using 50 ng of pMS188 and 140 ng of  
664 the purified PCR product. DH5-α bacterial strains were transformed and plated on  
665 plates containing Kanamycin. Presence and orientation of *APE1* gene in pMS188  
666 was then checked by digestion using XbaI, yielding 3 fragments of 1.6, 2.9 and 4.5  
667 kb on 1% agarose gel. The construct was then verified by sequencing using 5'-  
668 TACCCACCCGTC AAAGCTGTG-3', 5'-GGCGTCTTCCACACTCACTG-3', 5'-  
669 CACACCACTCCCGTAGCTGA-3', 5'-GAGGTGATCGCTTCGGTAGG-3' and 5'-  
670 TGGACGCAAATGGAAACAAG-3' primers. The transformation plasmid was then  
671 linearized with Scal-HF, transformation was done as stated above, and cells were  
672 plated on TAP containing Zeocin at 45 µg.mL<sup>-1</sup>.

673  
674 **Recombinant APE1 protein production.** *APE1* cDNA without the sequence coding  
675 for the transit peptide (*APE1* total protein, 223 amino acids) or without the sequence  
676 coding for the transmembrane domain (*APE1* soluble region, 156 amino acids) was  
677 introduced in pLIC03 vector (LIC : ligation-independent cloning; (Aslanidis and de  
678 Jong, 1990) using GoldenGate cloning technique. The pLIC03 vector is the pET-28a+  
679 vector (Novagen) modified to add downstream of the start codon a 6×His tag and a  
680 TEV protease-cleavage site. These are followed by the suicide gene *sacB* flanked by  
681 *BsaI* restriction sites, replaced by *APE1* cDNA flanked by complementary *BsaI*  
682 restriction sites sequences. 50 ng of vector was used with 1:3 cDNA for six  
683 successive rounds of digestion (*BsaI*, 37°C, 5 min) and ligation (T4 ligase, 16°C, 10  
684 min) in the same mix. Successful ligation of *APE1* cDNA removes the *BsaI*  
685 recognition sequence. The cycles were ended by a final ligation step (30 min at  
686 16°C). DH5α *E. coli* cells were then transformed with the ligation products for vector

687 amplification, screening and sequencing. 65 ng of vectors were then used to  
688 transform Rosetta *E. coli* cells cultured in TB medium at 37 °C up to OD 1. IPTG was  
689 added to induce APE1 recombinant protein expression, temperature was decreased  
690 to 17 °C and the cells were grown for an additional 18 h. Cells were harvested by  
691 centrifugation and the pellet was resuspended in lysis buffer during 30 min at 4°C.  
692 Lysis buffer contained 300 mM NaCl, 50 mM Tris pH 8.0, 10 mM imidazole, 5% (w/v)  
693 glycerol, 0.25 mg.mL<sup>-1</sup> lysozyme, 0.1% Triton, 1mM EDTA and protease inhibitors.  
694 Cells were lysed by sonication, and incubated at 25°C with 20 mM MgSO<sub>4</sub> and 10  
695 µg.mL<sup>-1</sup> DNase. The lysate was then centrifuged; the supernatant was collected and  
696 incubated for 5 min on 1 mL Ni Sepharose<sup>®</sup> 6Fast Flow (GE Healthcare) equilibrated  
697 with 10 mL binding buffer. The resin was washed (5 x 1mL) and eluted (5 x 1mL).  
698 Buffers contained 300 mM NaCl, 50 mM Tris pH 8.0, 5% (w/v) glycerol; with 10 mM  
699 imidazole for binding, 50 mM for washing and 250 mM for elution.

700

701 **Antibody generation.** APE1 recombinant protein containing only the soluble part  
702 was sent to ProteoGenix for antibody production from rabbit. 9 mL of filtered immune  
703 serum were purified against the soluble part of the recombinant protein (10 mg)  
704 covalently coupled to 1mL HiTrap NHS-activated HP resin (GE Healthcare) according  
705 to the manufacturer instructions. The serum recirculated on the resin for 2 hours at a  
706 flow rate of 0.5 mL/min and was eluted at pH 3. The eluted fraction was collected in  
707 neutralizing buffer. The antibody is used at 1:10000 dilution for immunoblotting.

708

709 **Spot tests.** 25µL of cells at 10<sup>6</sup> cells.mL<sup>-1</sup> were spotted on TAP or MIN plates,  
710 allowed to dry and placed at different light intensities as shown for 5-14 days.

711

712 **Pigment quantification.** Chlorophyll content was measured in acetone 80%  
713 according to Porra et al. (1989) or in methanol using:

714 Chlorophyll a = 15,65 · (OD<sub>666</sub> – OD<sub>750</sub>) – 7,34 · (OD<sub>653</sub> – OD<sub>750</sub>)

715 Chlorophyll b = 27,05 · (OD<sub>653</sub> – OD<sub>750</sub>) – 11,21 · (OD<sub>666</sub> – OD<sub>750</sub>)

716 Carotenoids (X + C) = (1000 · (OD<sub>470</sub> – OD<sub>750</sub>) – 2.86 · Chl a – 129.2 · Chl b) / 221

717

718 **Protein Analysis.** Proteins were extracted from total cells or thylakoids with cold  
719 acetone 80% and separated under denaturing conditions on 13% SDS-PAGE gels,  
720 unless otherwise indicated. Proteins were loaded based on chlorophyll content (1

721  $\mu\text{g}$ ), and total protein amount was quantified on Coomassie Blue gels to adjust the  
722 loading. SYPRO Ruby Protein gel stain was performed according to manufacturers  
723 protocol (Molecular Probes, Invitrogen). Proteins were transferred onto nitrocellulose  
724 membranes (BioTrace NT, Pall Corporation) using liquid transfer (except for Figure  
725 4D where 10% NativePAGE Bis-Tris MES gel (Invitrogen) and a semi-dry transfer  
726 was performed. All primary antibodies used were sourced from Agrisera. APE1  
727 antibody was generated in a rabbit against the soluble part of the recombinant  
728 protein. Secondary antibodies used were always HRP-conjugated anti-rabbit  
729 (Invitrogen). HRP-peroxidase chemiluminescent substrate (Invitrogen) was used to  
730 reveal the antibody signal using the GBOX imaging system (Syngene).

731  
732 **Thylakoid extraction and native protein analysis.** Thylakoid extraction was done  
733 according to the standard method (Chua and Bennoun, 1975). Thylakoids were  
734 resuspended in Hepes 5 mM, EDTA 10 mM at 1 mg/mL chlorophyll for subsequent  
735 SDS-PAGE analysis. For density gradient analysis and crosslinking, 1% digitonin  
736 (final) and then 1% n-Dodecyl- $\alpha$ -D-Maltoside (final) with 0.35% glutaraldehyde was  
737 loaded onto sucrose gradients and treated as in (Caffari et al.,ref). For non-  
738 denaturing conditions, thylakoids were resuspended in NativePAGE sample buffer  
739 (Life technologies) at 1 mg.mL<sup>-1</sup> chlorophyll, thylakoids were solubilized for 5 min on  
740 ice in the same volume of 2% n-Dodecyl- $\beta$ -D-Maltoside (0.5 mg.mL<sup>-1</sup> chlorophyll and  
741 1% n-Dodecyl- $\beta$ -D-Maltoside final). Differential solubilization was achieved by using  
742 1% digitonin (final) and then 1% n-Dodecyl- $\beta$ -D-Maltoside (final) on the remaining  
743 non-solubilized material. For interaction analysis, thylakoids were solubilized with  
744 0.5% digitonin (final) and 0.5% n-Dodecyl- $\alpha$ -D-Maltoside (final). Concentrations and  
745 resulting profiles were similar to that observed in (Pagliano et al., 2012) and were  
746 confirmed in figure 6. For each analysis, 20  $\mu\text{L}$  were then loaded with 2  $\mu\text{L}$  of G-250  
747 sample additive (Life technologies) on 4-16% (Figures 4A and 7) or 3-12% (figures  
748 4C and 6) NativePAGE gels (Life technologies). Cathode Running buffer (Life  
749 technologies) was supplemented with 0.02% G-250 for 2/3 of the migration, and with  
750 0.002% G-250 for the remaining third. For second dimension analysis, bands were  
751 incubated 1h at room temperature in LDS, 50 mM DTT and 5 M Urea and loaded on  
752 13% 5M urea SDS-PAGE. Gels were then either transferred on nitrocellulose or  
753 silver stained. Proteins separated by BN-PAGE were identified using immunoblots  
754 and silver staining on the second dimension, and by comparison to similar results in

755 the literature (Drop et al., 2011; Drop et al., 2014; Muranaka et al., 2016; Rexroth et  
756 al., 2003). Spectra of gradient fractions (350 -750 nm) were obtained using UV-Vis  
757 spectrophotometer (Varian Cary 300) at a scan rate of 240 nm/min and baseline  
758 correction.

759

## 760 **Chlorophyll Fluorescence Analysis**

761 Fluorescence measurements on Petri dishes were performed using the set up for *in*  
762 *vivo* chlorophyll fluorescence imaging (Beal SpeedZen Camera) (Johnson et al.,  
763 2009). Pulse-Amplitude-Modulation Fluorimeter (Walz) was used for chlorophyll  
764 fluorescence kinetics and monitoring of photoinhibition. Dark-adapted cells were  
765 subjected to a saturating pulse ( $8\ 000\ \mu\text{mol}_{\text{photons}}\cdot\text{m}^{-2}\cdot\text{s}^{-1}$ ) to measure  $F_v/F_M$  or  
766 exposed to a given light intensity (red light) and  $\Phi_{\text{PSII}}$  was probed every minute.  
767 Using the saturating pulse but with fast sampling kinetics, OJIP was monitored over  
768 300 milliseconds. Heterogeneity of PSII centres and connectivity of PSII centres was  
769 performed using the Joliot-type Spectrophotometer (JTS-Biologic). Melis has shown  
770 that the complementary area over the fluorescence curve (proportional to the  
771 reduction of  $Q_A$ ) of DCMU poisoned sample shows two phases in a semi-logarithmic  
772 plot (Melis and Homann, 1976). The fast phase, or  $\alpha$ -centers, appearing as a straight  
773 line at  $0 < t < 50$  ms corresponds to PSII with a large light harvesting capacity,  
774 whereas the slow phase, or  $\beta$ -centers, visible between  $100 < t < 250$  ms corresponds  
775 to PSII centers with less associated chlorophylls (core complex). The intercept of the  
776 slow component at  $t = 0$  (dotted lines) allows for quantification of the  $\alpha$ -centers.  
777 Connectivity was performed as in (Cuni et al., 2004)  $10\ \mu\text{M}$  DCMU was used to block  
778 electron transfer beyond  $Q_A$ . Connectivity between PSII centers is illustrated by the  
779 non-linearity between the variable part of chlorophyll fluorescence yield (probability to  
780 reemit a photon) against the relative concentration of reduced  $Q_A$  and data were  
781 fitted to  $F_v = [Q_A^-] / (1 + J - J [Q_A^-])$  yielding the connectivity parameter  $J$ .

782

783

784 **Photoinhibition experiments.** Cells were grown in TAP media at  $10\ \mu\text{mol}_{\text{photons}}\cdot\text{m}^{-2}\cdot\text{s}^{-1}$ ,  
785 diluted to a similar chlorophyll amount ( $3\ \mu\text{g}\cdot\text{mL}^{-1}$ ), allowed to stabilise for 1 hour  
786 at  $40\ \mu\text{mol}_{\text{photons}}\cdot\text{m}^{-2}\cdot\text{s}^{-1}$ , and then transferred to  $1800\ \mu\text{mol}_{\text{photons}}\cdot\text{m}^{-2}\cdot\text{s}^{-1}$  light for 1  
787 hour with or without  $0.1\ \text{mg/mL}$  chloramphenicol and  $0.5\ \text{mg/mL}$  lincomycin.  
788 Recovery was done at  $40\ \mu\text{mol}_{\text{photons}}\cdot\text{m}^{-2}\cdot\text{s}^{-1}$ .  $F_v/F_M$  was used as a non-invasive

789 measure of the maximum PSII quantum efficiency to monitor the degree of  
790 photoinhibition caused by the light treatment. Cells were placed in the dark for 3  
791 minutes with agitation before the measurement by PAM.

792

793 **Electronic Transmission Microscopy.** This experiment was performed twice on two  
794 different sets of cultures: cells were grown phototrophically and samples were taken  
795 either from turbidostats grown at  $40 \mu\text{mol}_{\text{photons}}\cdot\text{m}^{-2}\cdot\text{s}^{-1}$  or from batch culture flasks  
796 grown at  $80 \mu\text{mol}_{\text{photons}}\cdot\text{m}^{-2}\cdot\text{s}^{-1}$  (statistics are a mix of both samples). Cells were  
797 collected by centrifugation and fixed with 2.5% glutaraldehyde in 0.1 M sodium  
798 cacodylate buffer, pH 7.4, at 4 °C for two days. They were then washed three times  
799 using the same buffer. Samples were post-osmicated with 1% osmium tetroxide in  
800 cacodylate buffer for 1 h, dehydrated through a graded ethanol series, and finally  
801 embedded in monomeric resin Epon 812. All chemicals used for histological  
802 preparation were purchased from Electron Microscopy Sciences (Hatfield, USA). 90  
803 nm ultrathin sections for transmission electron microscope (TEM) were obtained by  
804 an ultramicrotome UCT (Leica Microsystems GmbH, Wetzlar, Germany) and  
805 mounted on copper grids. They were examined in a Tecnai G<sup>2</sup> Biotwin Electron  
806 Microscope (ThermoFisher Scientific FEI, Eindhoven, the Netherlands) using an  
807 accelerating voltage of 100 kV and equipped with a CCD camera Megaview III  
808 (Olympus Soft imaging Solutions GmbH, Münster, Germany). For each replicate,  
809 several photographs of entire cells and at least 20 micrographs of local detailed  
810 structures were taken, analyzed and compared.

811

### 812 **Accession numbers**

813 Sequence data for *C. reinhardtii* *APE1* from this article can be found in GenBank  
814 under the accession number NW\_001843882.1.

815

### 816 **Supplementary dMaterial files**

817 **Fig S1.** Mapping of the insertion in the *APE1* gene of *Chlamydomonas* in two alleles.

818 **Fig S2.** Summary scheme of highly conserved domains in APE1: Alignments of  
819 predicted protein sequences for *APE1* gene products.

820 **Fig S3.** Silver stain of 2<sup>nd</sup> dimension BN-PAGE of thylakoid proteins of *ape1-2*, *psbA*  
821 and *psaB* cells treated by high light in batch cultures.



822 **Fig S4.** Silver stain of 2<sup>nd</sup> dimension BN-PAGE thylakoid proteins of WT and *ape1-2*  
823 acclimated to high light in photobioreactors run as turbidostats.

824 **Fig S5.** TEM images at two different magnifications of thylakoid membranes from  
825 wild type and *ape1-2*.

826 **Table S1.** Photosynthetic parameters in different conditions

827 **Table S2.** Dimensions and membrane surfaces of the grana (stacked regions) in WT  
828 and *ape1-2* cells.

829 **Table S3.** List of cyanobacterial proteins conserved across all oxygenic phototrophs  
830 having the same genomic co-occurrence as APE1

|                         | condition (i) |               |                     | condition (iii)                       |               |                     |
|-------------------------|---------------|---------------|---------------------|---------------------------------------|---------------|---------------------|
|                         | Low light     |               |                     | Low light acclimated after high light |               |                     |
|                         | WT            | <i>ape1-2</i> | <i>ape1-2</i> :APE1 | WT                                    | <i>ape1-2</i> | <i>ape1-2</i> :APE1 |
| F t <sub>1/2</sub> (ms) | 0.199±0.017   | 0.171±0.013   | 0.189±0.011         | 0.214±0.018                           | 0.175±0.005*  | 0.225±0.009         |

831

832 **Table I.** Fluorescence half rise times are shown for *ape1-2* and control lines before  
833 the light treatment, (i) and after (iii) using mean values (n=3) with SEM. \* denotes that  
834 *ape1-2* was p < 0.05 significantly different from the controls.

835

### 836 **Acknowledgements**

837 We would like to thank Jerome Lavergne for invigorating and informative discussions  
838 and Corinne Cassier-Chauvat for help on cyanobacterial genome analysis. We  
839 acknowledge and are thankful to Stéphanie Blangy, Audrey Beyly-Adriano, Pascaline  
840 Auroy and Véronique Cardettini for technical assistance. This work was supported by  
841 a grant from the Agence National pour la Recherche (ChloroPaths : ANR-14-CE05-  
842 0041-01). M.C. was supported by a scholarship from the Ministry of Science and  
843 Education.

844

845

846 **Author Contributions**

847 MC, JA, JD, MF, GP, BG, XJ designed the research; MC, JA, SC, PB, SC, JD, MF, XJ  
848 performed research; MC, JA, SC, PB, SC, JD, MF, GP, BG, XJ analyzed data; and  
849 MC, JA, SC, XJ wrote the paper.

850

851 **References**

852

853 Adir, N., Zer, H., Shochat, S., and Ohad, I. (2003). Photoinhibition - a historical  
854 perspective. *Photosynthesis research* 76, 343-370.

855 Albanese, P., Melero, R., Engel, B.D., Grinzato, A., Berto, P., Manfredi, M., Chiodoni,  
856 A., Vargas, J., Sorzano, C.O.S., Marengo, E., *et al.* (2017). Pea PSII-LHCII  
857 supercomplexes form pairs by making connections across the stromal gap. *Scientific*  
858 *reports* 7, 10067.

859 Albanese, P., Nield, J., Tabares, J.A., Chiodoni, A., Manfredi, M., Gosetti, F.,  
860 Marengo, E., Saracco, G., Barber, J., and Pagliano, C. (2016). Isolation of novel PSII-  
861 LHCII megacomplexes from pea plants characterized by a combination of proteomics  
862 and electron microscopy. *Photosynthesis research* 130, 19-31.

863 Anderson, J.M., Chow, W.S., and Goodchild, D.J. (1988). Thylakoid membrane  
864 organisation in sun/shade acclimation. *Austr J Plant Physiol* 15, 11–26.

865 Anderson, J.M., Chow, W.S., and Park, Y.I. (1995). The grand design of  
866 photosynthesis: Acclimation of the photosynthetic apparatus to environmental cues.  
867 *Photosynthesis research* 46, 129-139.

868 Aslanidis, C., and de Jong, P.J. (1990). Ligation-independent cloning of PCR  
869 products (LIC-PCR). *Nucleic acids research* 18, 6069-6074.

870 Baena-Gonzalez, E., and Sheen, J. (2008). Convergent energy and stress signaling.  
871 *Trends in plant science* 13, 474-482.

872 Bec Kova, M., Yu, J., Krynicka, V., Kozlo, A., Shao, S., Konik, P., Komenda, J.,  
873 Murray, J.W., and Nixon, P.J. (2017). Structure of Psb29/Thf1 and its association with  
874 the FtsH protease complex involved in photosystem II repair in cyanobacteria.  
875 *Philosophical transactions of the Royal Society of London Series B, Biological*  
876 *sciences* 372.

877 Beck, C., Knoop, H., and Steuer, R. (2018). Modules of co-occurrence in the  
878 cyanobacterial pan-genome reveal functional associations between groups of  
879 ortholog genes. *PLoS genetics* 14, e1007239.

880 Bielczynski, L.W., Schansker, G., and Croce, R. (2016). Effect of Light Acclimation on  
881 the Organization of Photosystem II Super- and Sub-Complexes in *Arabidopsis*  
882 *thaliana*. *Frontiers in plant science* 7, 105.

883 Björkman, O., and Ludlow, M.M. (1972). Characterization of the light climate on the  
884 floor of a Queensland rainforest. *Carnegie Inst Washington Yearbook* 71, 85–94.

885 Boekema, E.J., van Breemen, J.F., van Roon, H., and Dekker, J.P. (2000).  
886 Arrangement of photosystem II supercomplexes in crystalline macrodomains within  
887 the thylakoid membrane of green plant chloroplasts. *Journal of molecular biology*  
888 301, 1123-1133.

889 Boekema, E.J., van Roon, H., Calkoen, F., Bassi, R., and Dekker, J.P. (1999).  
890 Multiple types of association of photosystem II and its light-harvesting antenna in  
891 partially solubilized photosystem II membranes. *Biochemistry* 38, 2233-2239.



892 Bricker, T.M., and Ghanotakis, D.F. (1996). Introduction to Oxygen Evolution and the  
893 Oxygen-Evolving Complex. In *Oxygenic Photosynthesis: The Light Reactions*  
894 *Advances in Photosynthesis and Respiration* O. D.R., Y. C.F., and H. I.F., eds.  
895 (Dordrecht: Springer).

896 Caffarri, S., Kouril, R., Kereiche, S., Boekema, E.J., and Croce, R. (2009). Functional  
897 architecture of higher plant photosystem II supercomplexes. *The EMBO journal* 28,  
898 3052-3063.

899 Caffarri, S., Tibiletti, T., Jennings, R.C., and Santabarbara, S. (2014). A comparison  
900 between plant photosystem I and photosystem II architecture and functioning.  
901 *Current protein & peptide science* 15, 296-331.

902 Chaux, F., Johnson, X., Auroy, P., Beyly-Adriano, A., Te, I., Cuine, S., and Peltier, G.  
903 (2017). PGRL1 and LHCSR3 Compensate for Each Other in Controlling  
904 Photosynthesis and Avoiding Photosystem I Photoinhibition during High Light  
905 Acclimation of *Chlamydomonas* Cells. *Molecular plant* 10, 216-218.

906 Chaux, F., Peltier, G., and Johnson, X. (2015). A security network in PSI  
907 photoprotection: regulation of photosynthetic control, NPQ and O<sub>2</sub> photoreduction by  
908 cyclic electron flow. *Frontiers in plant science* 6, 875.

909 Choquet, Y., Wostrikoff, K., Rimbault, B., Zito, F., Girard-Bascou, J., Drapier, D., and  
910 Wollman, F.A. (2001). Assembly-controlled regulation of chloroplast gene translation.  
911 *Biochemical Society transactions* 29, 421-426.

912 Chua, N.H., and Bennoun, P. (1975). Thylakoid membrane polypeptides of  
913 *Chlamydomonas reinhardtii*: wild-type and mutant strains deficient in photosystem II  
914 reaction center. *Proceedings of the National Academy of Sciences of the United*  
915 *States of America* 72, 2175-2179.

916 Correa-Galvis, V., Poschmann, G., Melzer, M., Stuhler, K., and Jahns, P. (2016a).  
917 PsbS interactions involved in the activation of energy dissipation in *Arabidopsis*.  
918 *Nature plants* 2, 15225.

919 Correa-Galvis, V., Redekop, P., Guan, K., Griess, A., Truong, T.B., Wakao, S., Niyogi,  
920 K.K., and Jahns, P. (2016b). Photosystem II Subunit PsbS Is Involved in the Induction  
921 of LHCSR Protein-dependent Energy Dissipation in *Chlamydomonas reinhardtii*. *The*  
922 *Journal of biological chemistry* 291, 17478-17487.

923 Cuni, A., Xiong, L., Sayre, R., Rappaport, F., and Lavergne, J. (2004). Modification of  
924 the pheophytin midpoint potential in photosystem II: Modulation of the quantum yield  
925 of charge separation and of charge recombination pathways. *Physical Chemistry*  
926 *Chemical Physics* 6, 4825-4831.

927 Dang, K.V., Plet, J., Tolleter, D., Jokel, M., Cuine, S., Carrier, P., Auroy, P., Richaud,  
928 P., Johnson, X., Alric, J., *et al.* (2014). Combined increases in mitochondrial  
929 cooperation and oxygen photoreduction compensate for deficiency in cyclic electron  
930 flow in *Chlamydomonas reinhardtii*. *The Plant cell* 26, 3036-3050.

931 Danielsson, R., Suorsa, M., Paakkarinen, V., Albertsson, P.A., Styring, S., Aro, E.M.,  
932 and Mamedov, F. (2006). Dimeric and monomeric organization of photosystem II.  
933 Distribution of five distinct complexes in the different domains of the thylakoid  
934 membrane. *The Journal of biological chemistry* 281, 14241-14249.

935 Dent, R.M., Haglund, C.M., Chin, B.L., Kobayashi, M.C., and Niyogi, K.K. (2005).  
936 Functional genomics of eukaryotic photosynthesis using insertional mutagenesis of  
937 *Chlamydomonas reinhardtii*. *Plant physiology* 137, 545-556.

938 Dinc, E., Ceppi, M.G., Toth, S.Z., Bottka, S., and Schansker, G. (2012). The chl a  
939 fluorescence intensity is remarkably insensitive to changes in the chlorophyll content  
940 of the leaf as long as the chl a/b ratio remains unaffected. *Biochimica et biophysica*  
941 *acta* 1817, 770-779.

- 942 Drop, B., Webber-Birungi, M., Fusetti, F., Kouril, R., Redding, K.E., Boekema, E.J.,  
943 and Croce, R. (2011). Photosystem I of *Chlamydomonas reinhardtii* contains nine  
944 light-harvesting complexes (Lhca) located on one side of the core. *The Journal of*  
945 *biological chemistry* *286*, 44878-44887.
- 946 Drop, B., Webber-Birungi, M., Yadav, S.K., Filipowicz-Szymanska, A., Fusetti, F.,  
947 Boekema, E.J., and Croce, R. (2014). Light-harvesting complex II (LHCII) and its  
948 supramolecular organization in *Chlamydomonas reinhardtii*. *Biochimica et biophysica*  
949 *acta* *1837*, 63-72.
- 950 Dumas, L., Chazaux, M., Peltier, G., Johnson, X., and Alric, J. (2016). Cytochrome b  
951 6 f function and localization, phosphorylation state of thylakoid membrane proteins  
952 and consequences on cyclic electron flow. *Photosynthesis research* *129*, 307-320.
- 953 Engel, B.D., Schaffer, M., Kuhn Cuellar, L., Villa, E., Pnitzko, J.M., and Baumeister, W.  
954 (2015). Native architecture of the *Chlamydomonas* chloroplast revealed by in situ  
955 cryo-electron tomography. *eLife* *4*.
- 956 Erickson, E., Wakao, S., and Niyogi, K.K. (2015). Light stress and photoprotection in  
957 *Chlamydomonas reinhardtii*. *The Plant journal : for cell and molecular biology* *82*,  
958 449-465.
- 959 Farquhar, G.D., von Caemmerer, S., and Berry, J.A. (1980). A biochemical model of  
960 photosynthetic CO<sub>2</sub> assimilation in leaves of C<sub>3</sub> species. *Planta* *149*, 78-90.
- 961 Fischer, B.B., Dayer, R., Schwarzenbach, Y., Lemaire, S.D., Behra, R., Liedtke, A.,  
962 and Eggen, R.I. (2009). Function and regulation of the glutathione peroxidase  
963 homologous gene GPXH/GPX5 in *Chlamydomonas reinhardtii*. *Plant molecular*  
964 *biology* *71*, 569-583.
- 965 Gonzalez-Ballester, D., de Montaigu, A., Galvan, A., and Fernandez, E. (2005).  
966 Restriction enzyme site-directed amplification PCR: a tool to identify regions flanking  
967 a marker DNA. *Analytical biochemistry* *340*, 330-335.
- 968 Goodenough, U.W., Armstrong, J.J., and Levine, R.P. (1969). Photosynthetic  
969 Properties of ac-31, a Mutant Strain of *Chlamydomonas reinhardtii* Devoid of  
970 Chloroplast Membrane Stacking. *Plant physiology* *44*, 1001-1012.
- 971 Goodenough, U.W., and Levine, R.P. (1969). Chloroplast Ultrastructure in Mutant  
972 Strains of *Chlamydomonas reinhardtii* Lacking Components of the Photosynthetic  
973 Apparatus. *Plant physiology* *44*, 990-1000.
- 974 Goodenough, U.W., and Staehelin, L.A. (1971). Structural differentiation of stacked  
975 and unstacked chloroplast membranes. Freeze-etch electron microscopy of wild-type  
976 and mutant strains of *Chlamydomonas*. *The Journal of cell biology* *48*, 594-619.
- 977 Guenther, J.E., and Melis, A. (1990). The physiological significance of photosystem II  
978 heterogeneity in chloroplasts. *Photosynthesis research* *23*, 105-109.
- 979 Harris, E.H. (1989). *The Chlamydomonas Sourcebook: A Comprehensive*  
980 *Guide to Biology and Laboratory Use*. (San Diego: Academic Press, ).
- 981 Heinnickel, M.L., and Grossman, A.R. (2013). The GreenCut: re-evaluation of  
982 physiological role of previously studied proteins and potential novel protein functions.  
983 *Photosynthesis research* *116*, 427-436.
- 984 Herbstová, M., Tietz, S., Kinzel, C., Turkina, M.V., and Kirchhoff, H. (2012).  
985 Architectural switch in plant photosynthetic membranes induced by light stress.  
986 *Proceedings of the National Academy of Sciences* *109*, 20130-20135.
- 987 Huang, W., Chen, Q., Zhu, Y., Hu, F., Zhang, L., Ma, Z., He, Z., and Huang, J. (2013).  
988 *Arabidopsis* thylakoid formation 1 is a critical regulator for dynamics of PSII-LHCII  
989 complexes in leaf senescence and excess light. *Molecular plant* *6*, 1673-1691.

- 990 Jarvi, S., Suorsa, M., and Aro, E.M. (2015). Photosystem II repair in plant  
991 chloroplasts--Regulation, assisting proteins and shared components with  
992 photosystem II biogenesis. *Biochimica et biophysica acta* 1847, 900-909.
- 993 Johnson, X., Steinbeck, J., Dent, R.M., Takahashi, H., Richaud, P., Ozawa, S.,  
994 Houille-Vernes, L., Petroustos, D., Rappaport, F., Grossman, A.R., *et al.* (2014).  
995 Proton gradient regulation 5-mediated cyclic electron flow under ATP- or redox-  
996 limited conditions: a study of DeltaATPase pgr5 and DeltarbcL pgr5 mutants in the  
997 green alga *Chlamydomonas reinhardtii*. *Plant physiology* 165, 438-452.
- 998 Johnson, X., Vandystadt, G., Bujaldon, S., Wollman, F.A., Dubois, R., Roussel, P.,  
999 Alric, J., and Beal, D. (2009). A new setup for in vivo fluorescence imaging of  
1000 photosynthetic activity. *Photosynthesis research* 102, 85-93.
- 1001 Johnson, X., Wostrikoff, K., Finazzi, G., Kuras, R., Schwarz, C., Bujaldon, S.,  
1002 Nickelsen, J., Stern, D.B., Wollman, F.A., and Vallon, O. (2010). MRL1, a conserved  
1003 Pentatricopeptide repeat protein, is required for stabilization of rbcL mRNA in  
1004 *Chlamydomonas* and *Arabidopsis*. *The Plant cell* 22, 234-248.
- 1005 Kallberg, M., Wang, H., Wang, S., Peng, J., Wang, Z., Lu, H., and Xu, J. (2012).  
1006 Template-based protein structure modeling using the RaptorX web server. *Nature*  
1007 *protocols* 7, 1511-1522.
- 1008 Khan, N.Z., Lindquist, E., and Aronsson, H. (2013). New putative chloroplast vesicle  
1009 transport components and cargo proteins revealed using a bioinformatics approach:  
1010 an *Arabidopsis* model. *PloS one* 8, e59898.
- 1011 Khatoun, M., Inagawa, K., Pospisil, P., Yamashita, A., Yoshioka, M., Lundin, B., Horie,  
1012 J., Morita, N., Jajoo, A., Yamamoto, Y., *et al.* (2009). Quality control of photosystem II:  
1013 Thylakoid unstacking is necessary to avoid further damage to the D1 protein and to  
1014 facilitate D1 degradation under light stress in spinach thylakoids. *The Journal of*  
1015 *biological chemistry* 284, 25343-25352.
- 1016 Kirchhoff, H. (2019). Chloroplast ultrastructure in plants. *The New phytologist* 223,  
1017 565-574.
- 1018 Komenda, J., and Sobotka, R. (2016). Cyanobacterial high-light-inducible proteins--  
1019 Protectors of chlorophyll-protein synthesis and assembly. *Biochimica et biophysica*  
1020 *acta* 1857, 288-295.
- 1021 Koochak, H., Puthiyaveetil, S., Mullendore, D.L., Li, M., and Kirchhoff, H. (2019). The  
1022 structural and functional domains of plant thylakoid membranes. *The Plant journal :*  
1023 *for cell and molecular biology* 97, 412-429.
- 1024 Kouril, R., Lukas, N., Semchonok, D.A., Boekema, E.J., and Ilik, P. (2018).  
1025 Membrane Protein Complexes: Structure and Function. In *Subcellular Biochemistry*,  
1026 E.J.B. J. Robin Harris, ed. (Singapore: Springer), p. 459.
- 1027 Kouril, R., Wientjes, E., Bultema, J.B., Croce, R., and Boekema, E.J. (2013). High-  
1028 light vs. low-light: effect of light acclimation on photosystem II composition and  
1029 organization in *Arabidopsis thaliana*. *Biochimica et biophysica acta* 1827, 411-419.
- 1030 Larosa, V., Meneghesso, A., La Rocca, N., Steinbeck, J., Hippler, M., Szabo, I., and  
1031 Morosinotto, T. (2018). Mitochondria Affect Photosynthetic Electron Transport and  
1032 Photosensitivity in a Green Alga. *Plant physiology* 176, 2305-2314.
- 1033 Li, X., Zhang, R., Patena, W., Gang, S.S., Blum, S.R., Ivanova, N., Yue, R.,  
1034 Robertson, J.M., Lefebvre, P.A., Fitz-Gibbon, S.T., *et al.* (2016). An Indexed, Mapped  
1035 Mutant Library Enables Reverse Genetics Studies of Biological Processes in  
1036 *Chlamydomonas reinhardtii*. *The Plant cell* 28, 367-387.
- 1037 Lu, Y. (2016). Identification and Roles of Photosystem II Assembly, Stability, and  
1038 Repair Factors in *Arabidopsis*. *Frontiers in plant science* 7, 168.

- 1039 Majeran, W., Zybaïlov, B., Ytterberg, A.J., Dunsmore, J., Sun, Q., and van Wijk, K.J.  
1040 (2008). Consequences of C4 differentiation for chloroplast membrane proteomes in  
1041 maize mesophyll and bundle sheath cells. *Molecular & cellular proteomics : MCP* 7,  
1042 1609-1638.
- 1043 Melis, A. (1991). Dynamics of photosynthetic membrane composition and function.  
1044 *Biochimica et biophysica acta* 1058, 87–106.
- 1045 Melis, A. (1996). Excitation energy transfer: functional and dynamic  
1046 aspects of Lhc (cab) proteins. In *Oxygenic Photosynthesis: The Light Reactions*  
1047 Volume 4 of *Advances in Photosynthesis and Respiration*, D.R. Ort, and C.F. Yocum,  
1048 eds. (Dordrecht, The Netherlands: Kluwer Academic Publishers), pp. 523–538.
- 1049 Melis, A., and Homann, P.H. (1976). Heterogeneity of the Photochemical centres in  
1050 system II of Chloroplasts *Photochemistry and Photobiology* 23, 343-350.
- 1051 Merchant, S.S., Prochnik, S.E., Vallon, O., Harris, E.H., Karpowicz, S.J., Witman,  
1052 G.B., Terry, A., Salamov, A., Fritz-Laylin, L.K., Marechal-Drouard, L., *et al.* (2007).  
1053 The *Chlamydomonas* genome reveals the evolution of key animal and plant  
1054 functions. *Science* 318, 245-250.
- 1055 Michaeli, S., Honig, A., Levanony, H., Peled-Zehavi, H., and Galili, G. (2014).  
1056 *Arabidopsis* ATG8-INTERACTING PROTEIN1 is involved in autophagy-dependent  
1057 vesicular trafficking of plastid proteins to the vacuole. *The Plant cell* 26, 4084-4101.
- 1058 Mulkidjanian, A.Y., Koonin, E.V., Makarova, K.S., Mekhedov, S.L., Sorokin, A., Wolf,  
1059 Y.I., Dufresne, A., Partensky, F., Burd, H., Kaznadzey, D., *et al.* (2006). The  
1060 cyanobacterial genome core and the origin of photosynthesis. *Proceedings of the*  
1061 *National Academy of Sciences of the United States of America* 103, 13126-13131.
- 1062 Munekage, Y.N., Genty, B., and Peltier, G. (2008). Effect of PGR5 impairment on  
1063 photosynthesis and growth in *Arabidopsis thaliana*. *Plant & cell physiology* 49, 1688-  
1064 1698.
- 1065 Muranaka, L.S., Rutgers, M., Bujaldon, S., Heublein, A., Geimer, S., Wollman, F.A.,  
1066 and Schroda, M. (2016). TEF30 Interacts with Photosystem II Monomers and Is  
1067 Involved in the Repair of Photodamaged Photosystem II in *Chlamydomonas*  
1068 *reinhardtii*. *Plant physiology* 170, 821-840.
- 1069 Myouga, F., Takahashi, K., Tanaka, R., Nagata, N., Kiss, A.Z., Funk, C., Nomura, Y.,  
1070 Nakagami, H., Jansson, S., and Shinozaki, K. (2018). Stable Accumulation of  
1071 Photosystem II Requires ONE-HELIX PROTEIN1 (OHP1) of the Light Harvesting-  
1072 Like Family. *Plant physiology* 176, 2277-2291.
- 1073 Nawrocki, W.J., Liu, X., and Croce, R. (2020). *Chlamydomonas reinhardtii* Exhibits  
1074 De Facto Constitutive NPQ Capacity in Physiologically Relevant Conditions. *Plant*  
1075 *physiology* 182, 472-479.
- 1076 Pagliano, C., Barera, S., Chimirri, F., Saracco, G., and Barber, J. (2012). Comparison  
1077 of the alpha and beta isomeric forms of the detergent n-dodecyl-D-maltoside for  
1078 solubilizing photosynthetic complexes from pea thylakoid membranes. *Biochimica et*  
1079 *biophysica acta* 1817, 1506-1515.
- 1080 Plochinger, M., Schwenkert, S., von Sydow, L., Schroder, W.P., and Meurer, J.  
1081 (2016). Functional Update of the Auxiliary Proteins PsbW, PsbY, HCF136, PsbN,  
1082 TerC and ALB3 in Maintenance and Assembly of PSII. *Frontiers in plant science* 7,  
1083 423.
- 1084 Polukhina, I., Fristedt, R., Dinc, E., Cardol, P., and Croce, R. (2016). Carbon Supply  
1085 and Photoacclimation Cross Talk in the Green Alga *Chlamydomonas reinhardtii*. *Plant*  
1086 *physiology* 172, 1494-1505.
- 1087 Pribil, M., Labs, M., and Leister, D. (2014). Structure and dynamics of thylakoids in  
1088 land plants. *J Exp Bot* 65, 1955-1972.



1089 Pribil, M., Sandoval-Ibanez, O., Xu, W., Sharma, A., Labs, M., Liu, Q., Galgenmuller,  
1090 C., Schneider, T., Wessels, M., Matsubara, S., *et al.* (2018). Fine-Tuning of  
1091 Photosynthesis Requires CURVATURE THYLAKOID1-Mediated Thylakoid Plasticity.  
1092 *Plant physiology* 176, 2351-2364.  
1093 Rexroth, S., Meyer zu Tittingdorf, J.M., Krause, F., Dencher, N.A., and Seelert, H.  
1094 (2003). Thylakoid membrane at altered metabolic state: challenging the forgotten  
1095 realms of the proteome. *Electrophoresis* 24, 2814-2823.  
1096 Rexroth, S., Mullineaux, C.W., Ellinger, D., Sendtko, E., Rogner, M., and Koenig, F.  
1097 (2011). The plasma membrane of the cyanobacterium *Gloeobacter violaceus*  
1098 contains segregated bioenergetic domains. *The Plant cell* 23, 2379-2390.  
1099 Roach, T., Baur, T., Stoggl, W., and Krieger-Liszkay, A. (2017). *Chlamydomonas*  
1100 *reinhardtii* responding to high light: a role for 2-propenal (acrolein). *Physiologia*  
1101 *plantarum* 161, 75-87.  
1102 Rochaix, J.D. (2014). Regulation and dynamics of the light-harvesting system. *Annual*  
1103 *review of plant biology* 65, 287-309.  
1104 Rozak, P.R., Seiser, R.M., Wacholtz, W.F., and Wise, R.R. (2002). Rapid, reversible  
1105 alterations in spinach thylakoid appression upon changes in light intensity. *Plant, Cell*  
1106 *and Environment* 25, 421-429.  
1107 Schroda, M., Beck, C.F., and Vallon, O. (2002). Sequence elements within an HSP70  
1108 promoter counteract transcriptional transgene silencing in *Chlamydomonas*. *The*  
1109 *Plant journal : for cell and molecular biology* 31, 445-455.  
1110 Schwarz, E.M., Tietz, S., and Froehlich, J.E. (2018). Photosystem I-LHCII  
1111 mega-complexes respond to high light and aging in plants. *Photosynthesis research*  
1112 136, 107-124.  
1113 Semchonok, D.A., Sathish Yadav, K.N., Xu, P., Drop, B., Croce, R., and Boekema,  
1114 E.J. (2017). Interaction between the photoprotective protein LHCSR3 and C2S2  
1115 Photosystem II supercomplex in *Chlamydomonas reinhardtii*. *Biochimica et*  
1116 *biophysica acta Bioenergetics* 1858, 379-385.  
1117 Shen, L., Huang, Z., Chang, S., Wang, W., Wang, J., Kuang, T., Han, G., Shen, J.R.,  
1118 and Zhang, X. (2019). Structure of a C2S2M2N2-type PSII-LHCII supercomplex from  
1119 the green alga *Chlamydomonas reinhardtii*. *Proceedings of the National Academy of*  
1120 *Sciences of the United States of America* 116, 21246-21255.  
1121 Shi, L.X., Hall, M., Funk, C., and Schroder, W.P. (2012). Photosystem II, a growing  
1122 complex: updates on newly discovered components and low molecular mass  
1123 proteins. *Biochimica et biophysica acta* 1817, 13-25.  
1124 Sizova, I., Fuhrmann, M., and Hegemann, P. (2001). A *Streptomyces rimosus* aphVIII  
1125 gene coding for a new type phosphotransferase provides stable antibiotic resistance  
1126 to *Chlamydomonas reinhardtii*. *Gene* 277, 221-229.  
1127 Stark, H. (2010). GraFix: stabilization of fragile macromolecular complexes for single  
1128 particle cryo-EM. *Methods in enzymology* 481, 109-126.  
1129 Su, X., Ma, J., Wei, X., Cao, P., Zhu, D., Chang, W., Liu, Z., Zhang, X., and Li, M.  
1130 (2017). Structure and assembly mechanism of plant C2S2M2-type PSII-LHCII  
1131 supercomplex. *Science* 357, 815-820.  
1132 Suorsa, M., Rantala, M., Mamedov, F., Lespinasse, M., Trotta, A., Grieco, M., Vuorio,  
1133 E., Tikkanen, M., Jarvi, S., and Aro, E.M. (2015). Light acclimation involves dynamic  
1134 re-organization of the pigment-protein mega-complexes in non-appressed thylakoid  
1135 domains. *The Plant journal : for cell and molecular biology* 84, 360-373.  
1136 Terashima, M., Specht, M., and Hippler, M. (2011). The chloroplast proteome: a  
1137 survey from the *Chlamydomonas reinhardtii* perspective with a focus on distinctive  
1138 features. *Current genetics* 57, 151-168.

- 1139 Theis, J., and Schroda, M. (2016). Revisiting the photosystem II repair cycle. *Plant*  
1140 *Signaling & Behavior* *11*, e1218587.
- 1141 Thornton, L.E., Ohkawa, H., Roose, J.L., Kashino, Y., Keren, N., and Pakrasi, H.B.  
1142 (2004). Homologs of plant PsbP and PsbQ proteins are necessary for regulation of  
1143 photosystem ii activity in the cyanobacterium *Synechocystis* 6803. *The Plant cell* *16*,  
1144 2164-2175.
- 1145 Tibiletti, T., Auroy, P., Peltier, G., and Caffarri, S. (2016). *Chlamydomonas reinhardtii*  
1146 *PsbS* Protein Is Functional and Accumulates Rapidly and Transiently under High  
1147 Light. *Plant physiology* *171*, 2717-2730.
- 1148 Tomizioli, M., Lazar, C., Brugiére, S., Burger, T., Salvi, D., Gatto, L., Moyet, L.,  
1149 Breckels, L.M., Hesse, A.M., Lilley, K.S., *et al.* (2014). Deciphering thylakoid sub-  
1150 compartments using a mass spectrometry-based approach. *Molecular & cellular*  
1151 *proteomics : MCP* *13*, 2147-2167.
- 1152 Torabi, S., Umate, P., Manavski, N., Plochinger, M., Kleinknecht, L., Bogireddi, H.,  
1153 Herrmann, R.G., Wanner, G., Schroder, W.P., and Meurer, J. (2014). *PsbN* is required  
1154 for assembly of the photosystem II reaction center in *Nicotiana tabacum*. *The Plant*  
1155 *cell* *26*, 1183-1199.
- 1156 Tyystjarvi, E., and Aro, E.M. (1996). The rate constant of photoinhibition, measured in  
1157 lincomycin-treated leaves, is directly proportional to light intensity. *Proceedings of the*  
1158 *National Academy of Sciences of the United States of America* *93*, 2213-2218.
- 1159 Umena, Y., Kawakami, K., Shen, J.R., and Kamiya, N. (2011). Crystal structure of  
1160 oxygen-evolving photosystem II at a resolution of 1.9 Å. *Nature* *473*, 55-60.
- 1161 Walters, R.G. (2005). Towards an understanding of photosynthetic acclimation. *J Exp*  
1162 *Bot* *56*, 435-447.
- 1163 Walters, R.G., Shephard, F., Rogers, J.J., Rolfe, S.A., and Horton, P. (2003).  
1164 Identification of mutants of *Arabidopsis* defective in acclimation of photosynthesis to  
1165 the light environment. *Plant physiology* *131*, 472-481.
- 1166 Wang, L., Yamano, T., Takane, S., Niiikawa, Y., Toyokawa, C., Ozawa, S.I., Tokutsu,  
1167 R., Takahashi, Y., Minagawa, J., Kanesaki, Y., *et al.* (2016). Chloroplast-mediated  
1168 regulation of CO<sub>2</sub>-concentrating mechanism by Ca<sup>2+</sup>-binding protein CAS in the  
1169 green alga *Chlamydomonas reinhardtii*. *Proceedings of the National Academy of*  
1170 *Sciences of the United States of America* *113*, 12586-12591.
- 1171 Wei, X., Su, X., Cao, P., Liu, X., Chang, W., Li, M., Zhang, X., and Liu, Z. (2016).  
1172 Structure of spinach photosystem II-LHCII supercomplex at 3.2 Å resolution. *Nature*  
1173 *534*, 69-74.
- 1174 Yang, D.H., Webster, J., Adam, Z., Lindahl, M., and Andersson, B. (1998). Induction  
1175 of acclimative proteolysis of the light-harvesting chlorophyll a/b protein of  
1176 photosystem II in response to elevated light intensities. *Plant physiology* *118*, 827-  
1177 834.
- 1178 Zehr, J.P., Bench, S.R., Carter, B.J., Hewson, I., Niazi, F., Shi, T., Tripp, H.J., and  
1179 Affourtit, J.P. (2008). Globally distributed uncultivated oceanic N<sub>2</sub>-fixing  
1180 cyanobacteria lack oxygenic photosystem II. *Science* *322*, 1110-1112.
- 1181 Zhang, R., Patena, W., Armbruster, U., Gang, S.S., Blum, S.R., and Jonikas, M.C.  
1182 (2014). High-Throughput Genotyping of Green Algal Mutants Reveals Random  
1183 Distribution of Mutagenic Insertion Sites and Endonucleolytic Cleavage of  
1184 Transforming DNA. *The Plant cell* *26*, 1398-1409.
- 1185  
1186

Figure 1.

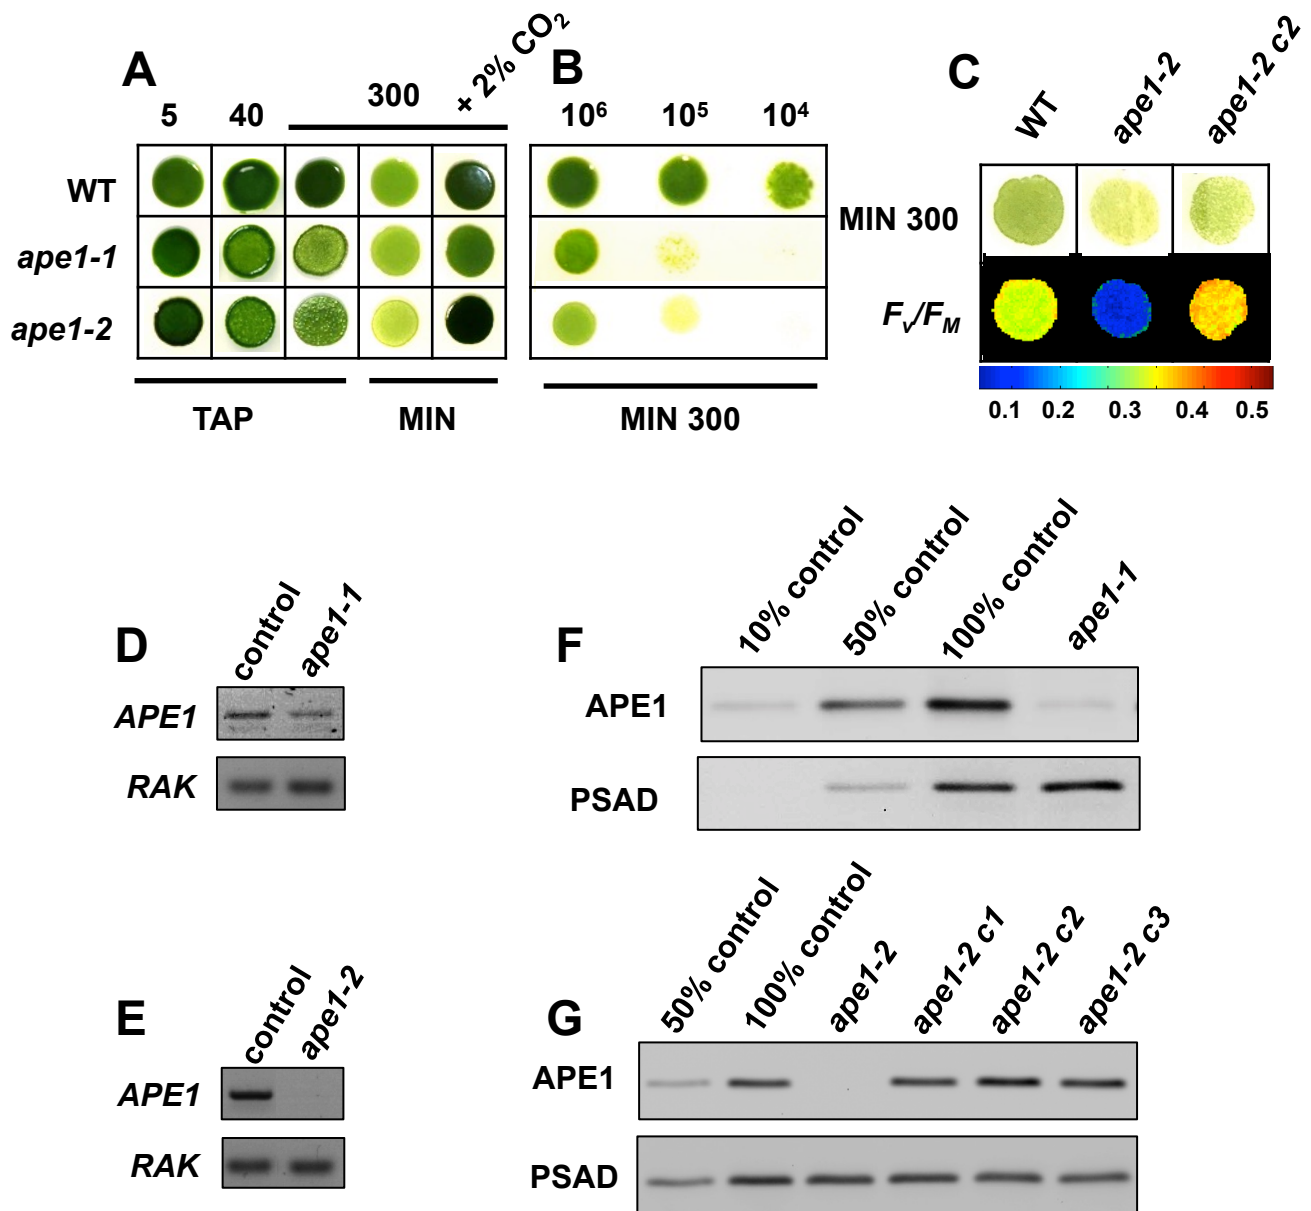

**Figure 1. Identification of *ape1* alleles that are interrupted in *Cre16.g665250* encoding APE1, a protein that contributes to optimal growth in high light. A.** Spot tests ( $10^6$  cells.mL<sup>-1</sup>) on rich media (TAP) versus minimal media (MIN) at different light intensities and with or without supplement of 2% CO<sub>2</sub>. **B.** Dilution series of cells grown at high light ( $300 \mu\text{mol}_{\text{photons}}\cdot\text{m}^{-2}\cdot\text{s}^{-1}$ ) on minimal media. **C.** Growth and maximum PSII quantum yield on minimal media grown at high light. The false color images give a range for the  $F_V/F_M$  value. **D.** RT-PCR on control lines, *ape1-1* and **E.** *ape1-2* using *RAK* gene as a positive control and primers E and F (see Supplemental Figure 1) for *APE1*. **F.** APE1 immunoblot of total cell proteins of control line and wild type versus *ape1-1* and **G.** *ape1-2* and three complemented lines. PSAD was used as a loading control.



Figure 2.

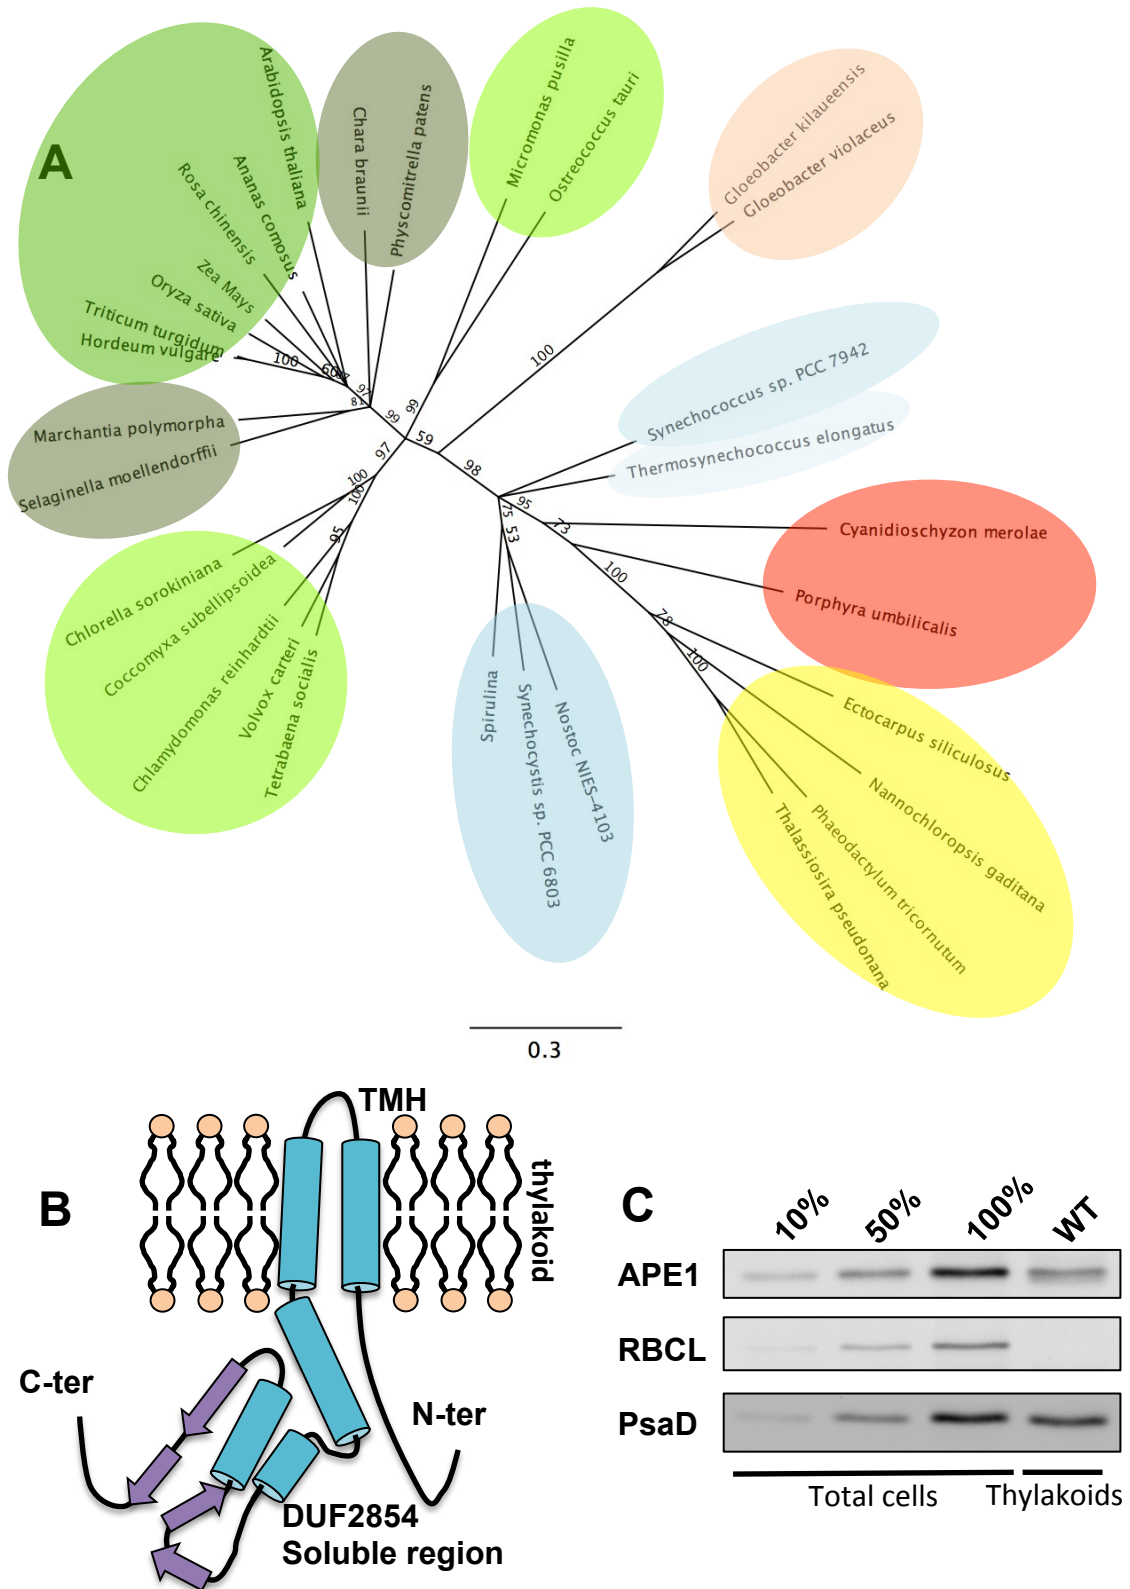

**Figure 2. APE1 is a thylakoid protein present in all oxygenic phototrophs. A.** Cladogram of APE1: Representative APE1 protein sequences from all clades of oxygenic photosynthetic species were identified by BLAST, alignment was done using Geneious (MUSCLE Alignment). The cladogram was constructed using a Jukes-Cantor genetic distance model neighbor-joining tree build method, unrooted, with Bootstrap consensus shown on branches. Colour codes represent phylum and distribution: green: land plants; army green: primitive plants; pale green: green algae; pale pink: primitive cyanobacteria; pale blue: hot spring cyanobacteria; blue: marine cyanobacteria; darker blue; fresh water cyanobacteria; pink: red algae; yellow: heterokont algae. **B.** Secondary structure model of the APE1 protein in the thylakoid lipid bilayer showing predicted (RaptorX) transmembrane and alpha helices (in blue) and beta-coil (in purple). **C.** Immunoblot of APE1 in total cells and thylakoids of the wild type. RBCL was used as a stromal control; PSAD was used as a thylakoid control.

Figure 3.

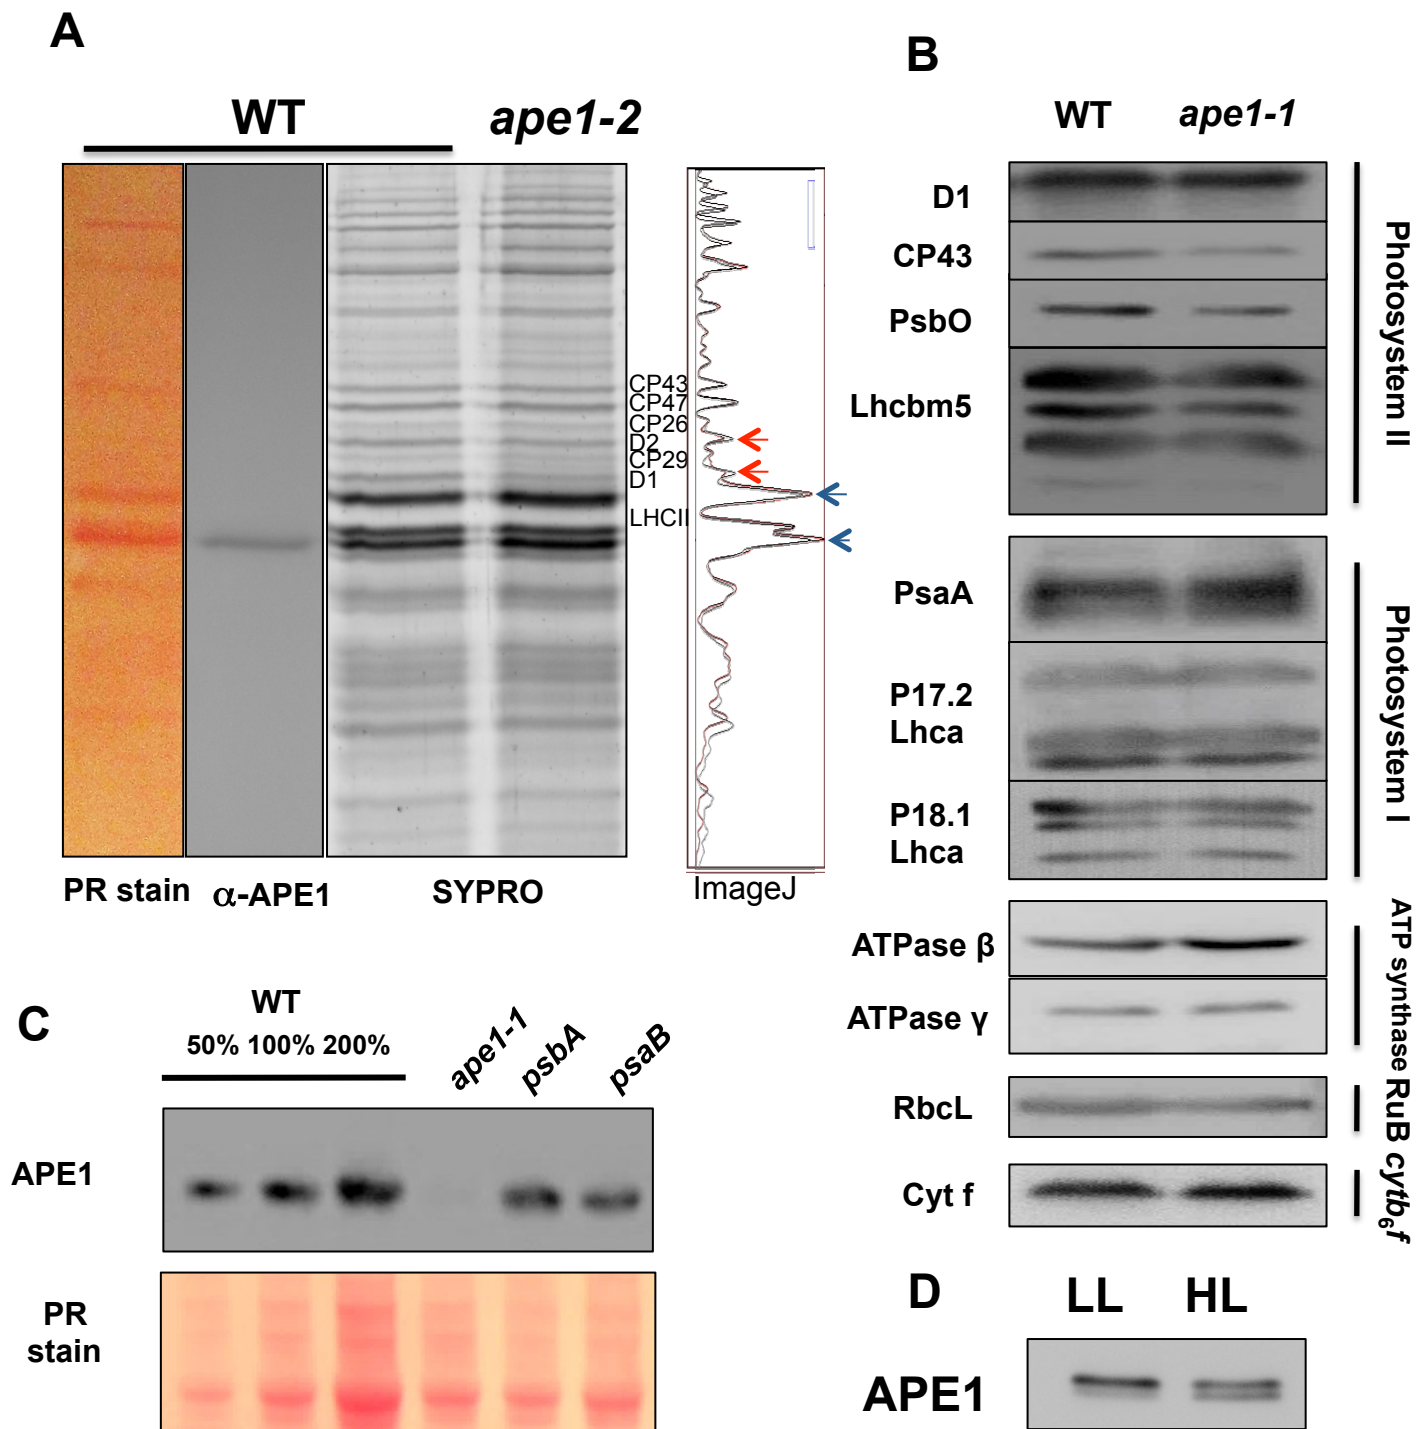

**Figure 3. APE1 contributes to PSII accumulation but is not required for photosystem biogenesis.** **A.** Thylakoid proteins were isolated from WT and *ape1-2* grown under low light ( $10 \mu\text{mol}_{\text{photons}}\cdot\text{m}^{-2}\cdot\text{s}^{-1}$ ) in heterotrophic conditions and separated using denaturing gels (15.5% 6M Urea) that were used for immunoblot of APE1 and for SYPRO staining. PSII proteins, minor antennae and LHCII were identified and quantified using image analysis (ImageJ). **B.** Immunoblot analysis of major photosynthetic complexes shown for wildtype and *ape1-1* grown at low light ( $80 \mu\text{mol}_{\text{photons}}\cdot\text{m}^{-2}\cdot\text{s}^{-1}$  under phototrophic conditions). **C.** Immunoblot analysis of APE1 accumulation in *ape1-1*, and mutants lacking PSII (*psbA*) and PSI (*psaB*). Ponceau Red was used as a loading control. **D.** Cells were sampled from photobioreactors at low (LL) and high light (HL) at the same cellular density and loaded onto denaturing gels. Western blot analysis was used to measure APE1 accumulation and bands were quantified using ImageJ.

Figure 4.

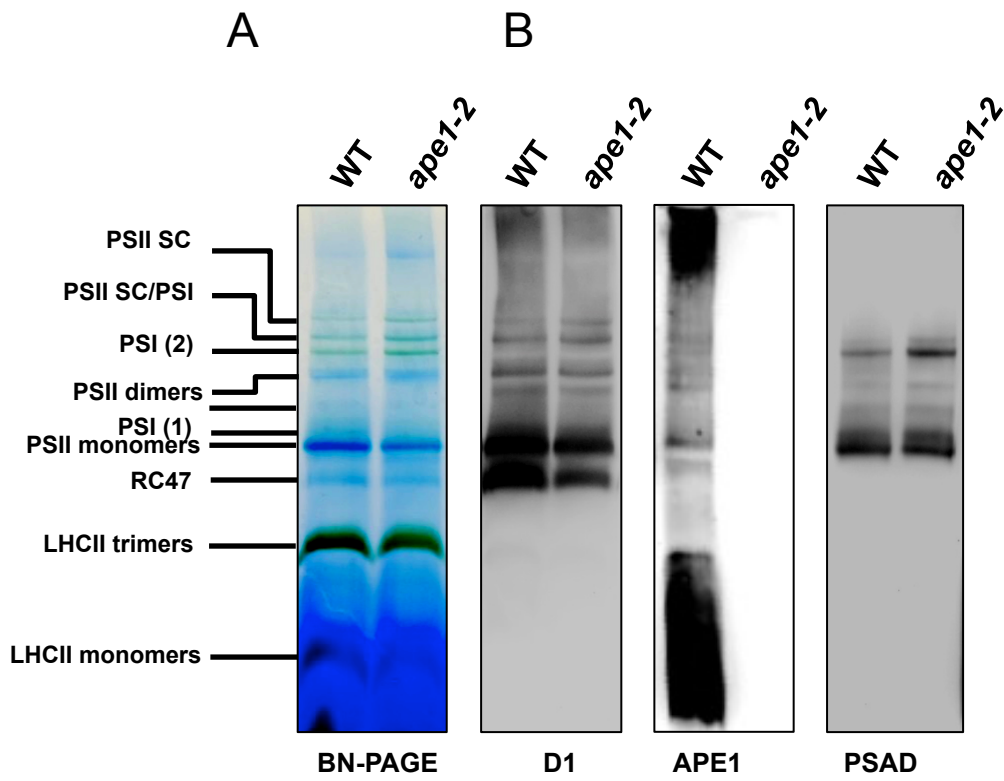

**Figure 4. APE1 affects the distribution of high molecular mass photosystem complexes and the APE1 protein co-migrates with PSII. A.** Analysis of native protein complex formation of WT and *ape1-2* cells grown phototrophically in low light. Thylakoid membrane proteins were solubilized using 0.5% digitonin/0.5%  $\alpha$ -DM and separated by BN-PAGE (4-16%). Proteins were loaded on a per chlorophyll basis. **B.** Immunoblot analysis of the BN-PAGE in (A.) using antisera against D1 protein, APE1 and PSAD.



Figure 5.

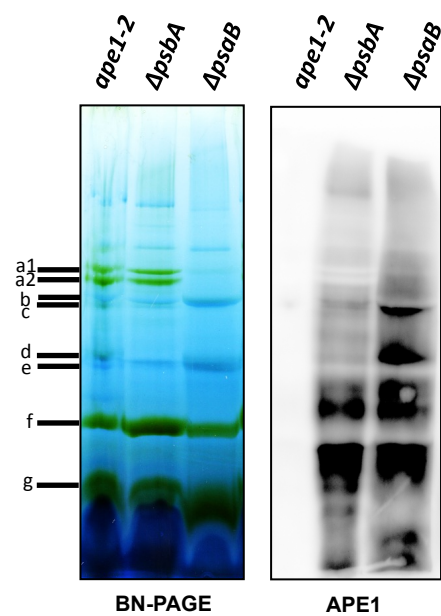

**Figure 5.** BN-PAGE (3-12%) analysis of *psbA* and *psaB* mutants grown heterotrophically in low light ( $10 \mu\text{mol}_{\text{photons}}\cdot\text{m}^{-2}\cdot\text{s}^{-1}$ ) with thylakoids isolated and treated under the same conditions as in Figure 4 and immunoblot analysis using the APE1 antibody. Labelled bands were identified by excising the lanes and separation by SDS-PAGE in the second dimension : a1, PSI; a2, PSI; b, PSII dimers; c, PSI core; d, PSII monomers; e, *cyt<sub>b6/f</sub>*; f, LHCII trimers; g, LHCII monomers.

Figure 6.

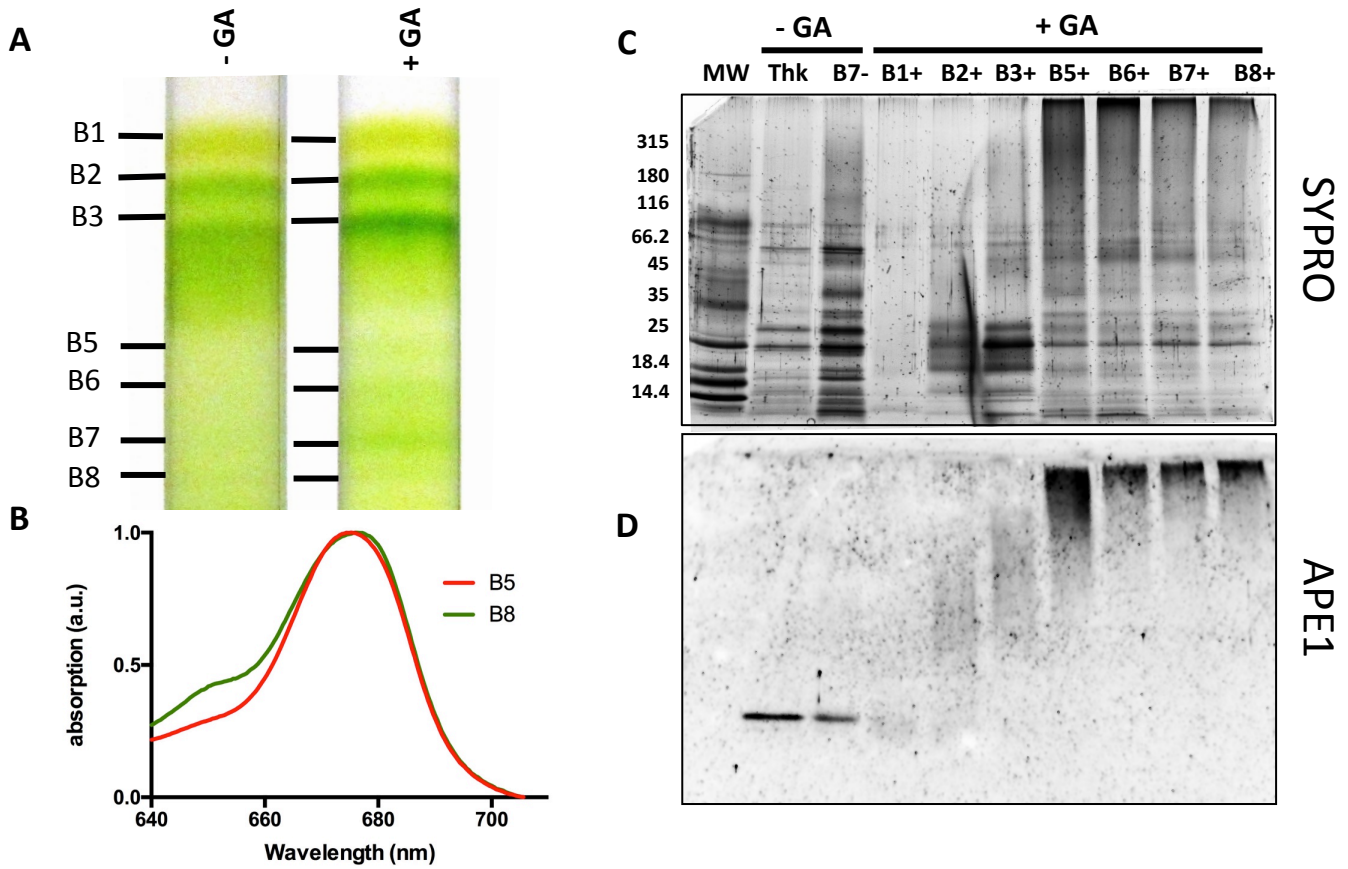

**Figure 6. Crosslinking of native thylakoid complexes reveals the interaction between APE1 and PSII core.** **A.** Thylakoid membranes extracted from wildtype cells grown phototrophically in low light were solubilized in 1%  $\alpha$ -DM and 1% Digitonin, and loaded on sucrose gradients, with or without addition of glutaraldehyde (GA) as a crosslinker and subjected to ultracentrifugation. Labeled bands were isolated by syringe and these fractions were identified by their absorption spectra. **B.** absorption spectra at room temperature of the fractions B5 and fraction B8 from sucrose gradients. The spectra were normalised to maxima and minima in the 640-710 nm region. **C.** The different fractions with or without addition of glutaraldehyde (GA) shown in (A.) were analyzed by denaturing SDS-PAGE and stained with SYPRO, alongside the molecular weight marker (MW) and a sample of the non-treated thylakoid membranes (Thk). **D.** Immunoblot analysis of the gel shown in (B.) decorated with the APE1 antibody.

Figure 7.

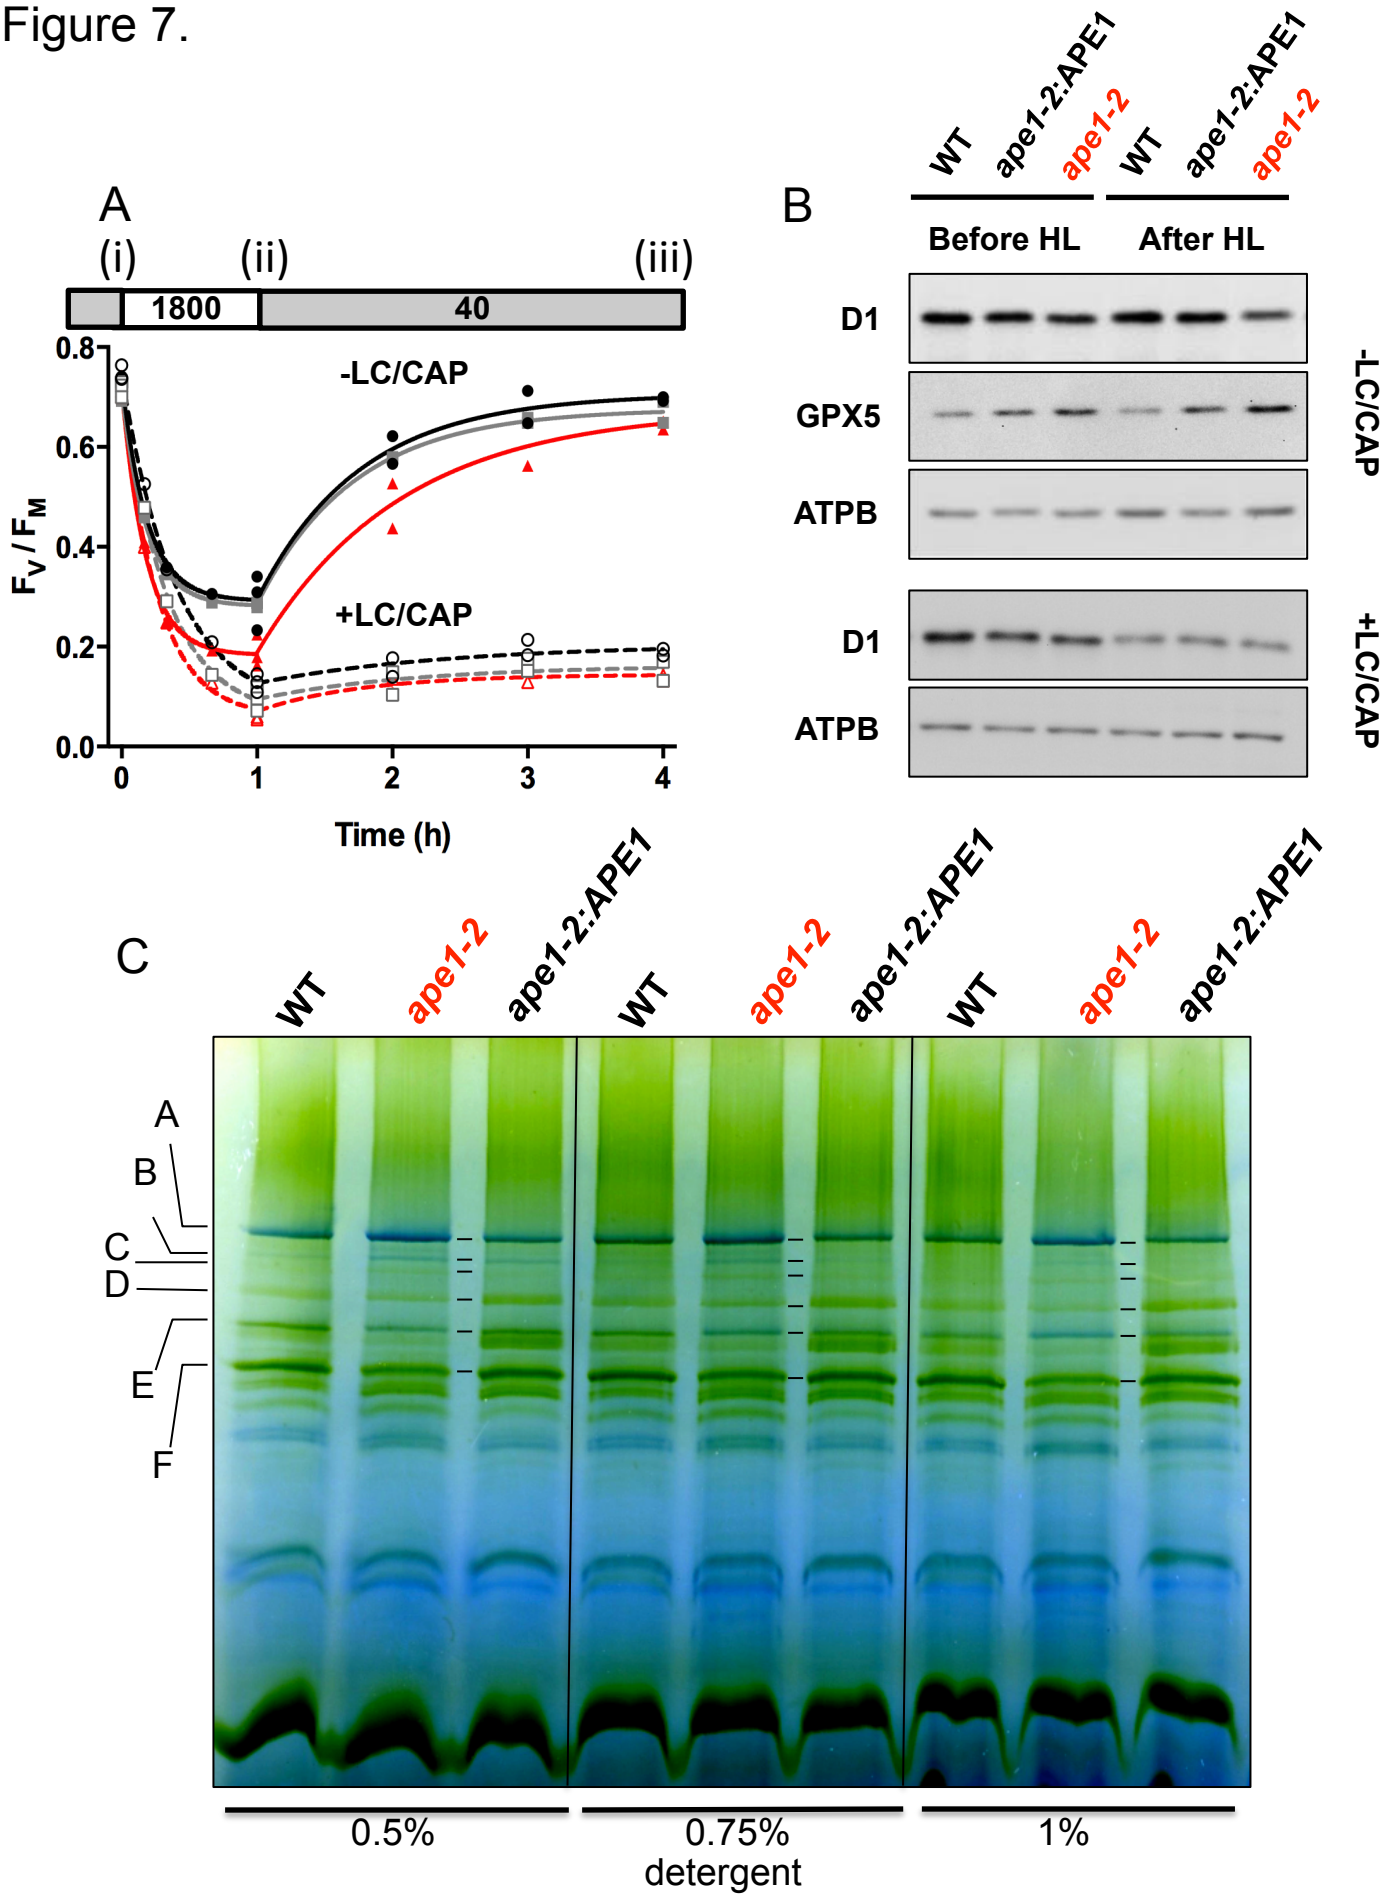

**Figure 7. APE1 protects against photoinhibition. A.** The wild type (black solid line), *ape1-2* complemented (grey solid line) and *ape1-2* (red solid line) strains in TAP media at the same cellular density were placed at (i)  $40 \mu\text{mol}_{\text{photons}}\cdot\text{m}^{-2}\cdot\text{s}^{-1}$  for 60 min, (ii) photoinhibited (PI) for 60 min at  $1,800 \mu\text{mol}_{\text{photons}}\cdot\text{m}^{-2}\cdot\text{s}^{-1}$ , and then (iii) allowed to recover at  $40 \mu\text{mol}_{\text{photons}}\cdot\text{m}^{-2}\cdot\text{s}^{-1}$ . PSII fluorescence was measured by pulse amplitude-modulated fluorometry. Lincomycin and chloramphenicol were added (+LC/CAP) to inhibit translation of chloroplastic proteins (dashed lines). Two replicates are shown and curves were fitted using a single exponential. **B.** Immunoblot analysis of D1 and GPX5 (monitoring ROS production) accumulation during the experiment shown in (A.), before and after the high light treatment, both without and with inhibitors of protein translation. ATPB was used as a loading control. **C.** Cells from *ape1-2*, WT and *ape1-2*:APE1 were grown phototrophically in batch cultures at ambient  $\text{CO}_2$  at low light and then subjected to high light ( $300 \mu\text{mol}_{\text{photons}}\cdot\text{m}^{-2}\cdot\text{s}^{-1}$ ) overnight (16 hours). Thylakoids were isolated and the concentration of the solubilizing agents  $\alpha$ -DM and digitonin were varied from 0.5 to 1 % for the same concentration of chlorophyll per sample and separated by BN PAGE (3-12%). The complexes showing the major differences between the *ape1-2* and the control lines were identified in *ape1-2* and represented by the letters: . A. PSII SC, PSI, mitoATPsynthase, B. PSII SC, mitoATPsynthase, C. PSII SC, mitoATPsynthase, D. PSII SC, mitoATPsynthase, E. PSII core dimers, LHCII, PSI, F. PSI



Figure 8.

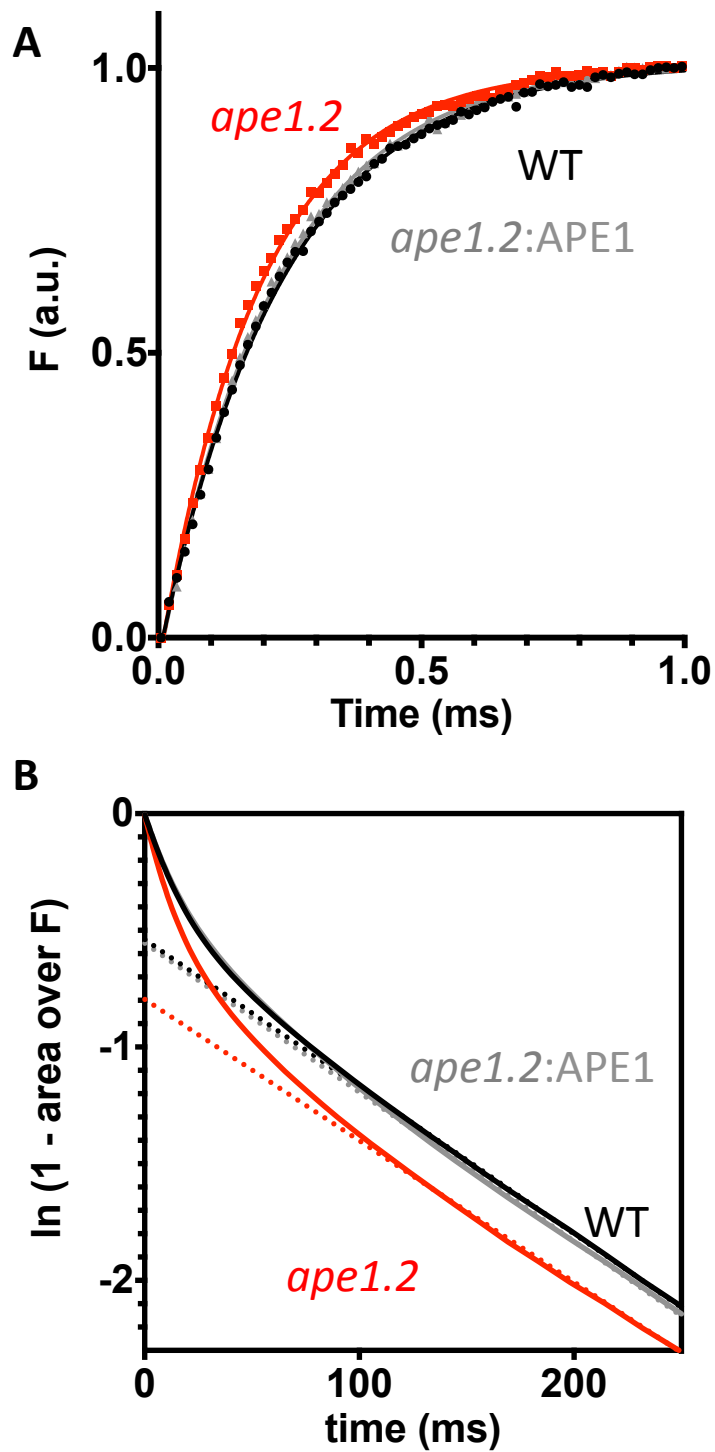

**Figure 8. Differences in effective antenna size can be measured *in vivo*** between wild type (black), *ape1-2* (red) and *ape1-2: APE1* (grey) **A.** A typical fluorescence rise (F) for intact cells at room temperature pre-treated with high light ( $500 \mu\text{mol photons.m}^{-2}.\text{s}^{-1}$ ) with recovery in low light ( $40 \mu\text{mol photons.m}^{-2}.\text{s}^{-1}$ ) as in (iii) Figure 7. Actinic light was  $8000 \mu\text{mol photons.m}^{-2}.\text{s}^{-1}$ . Data is normalized with  $F = 0-1$  **B.** Estimation of the relative fraction of  $\alpha$ -centers, i.e. large antenna size Photosystem II. The bi-phasic  $Q_A$  reduction rate as the time-dependent complementary area over the fluorescence rise, shown in logarithmic scale. Dotted lines intercept the ordinate axis at  $t = 0$ , yielding 55%  $\alpha$ -centres for *ape1-2* and 42% for wild type and *ape1-2:APE1*. The experiments shown are representative of  $n > 3$  showing similar trends.

Figure 9.

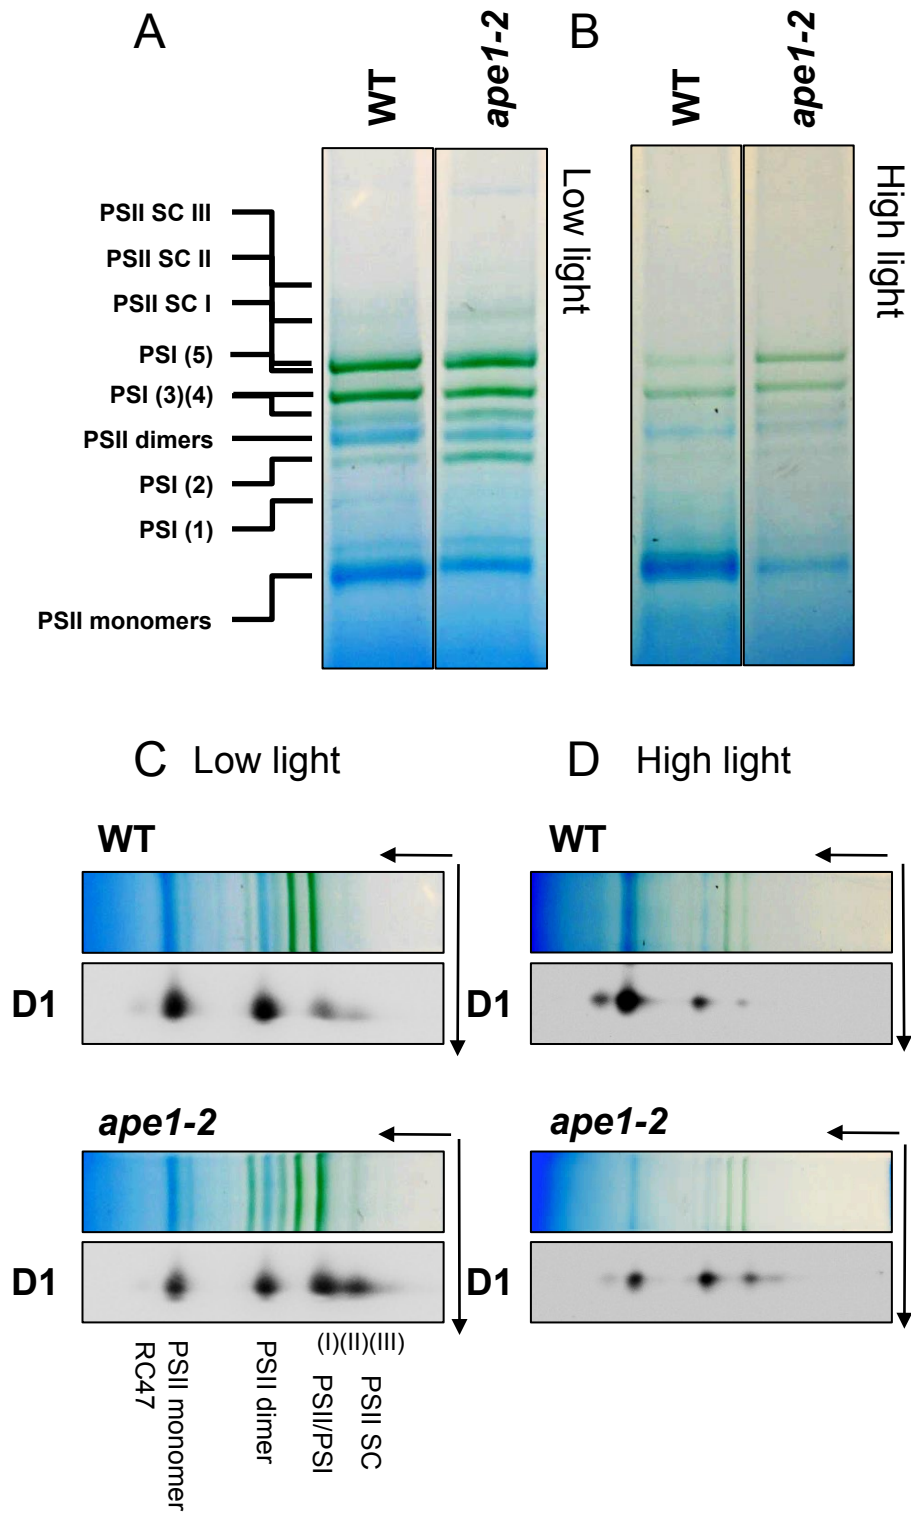

**Figure 9. APE1 participates in the mobility of PSII complexes towards core monomers in response to an acclimation to high light** **A.** BN-PAGE analysis of thylakoid proteins from wild type and *ape1-2* cells acclimated to low light and **B.** acclimated to high light. Thylakoid membrane proteins were solubilized using 1%  $\beta$ -DM and Digitonin and separated by BN-PAGE (4-16%). Proteins were loaded on a per chlorophyll basis. **C.** and **D.** The second dimension analysis was performed by excising and denaturing the BN-PAGE lane and proteins were separated by SDS-PAGE followed by immunoblotting using antisera against PSII D1 protein.

Figure 10.

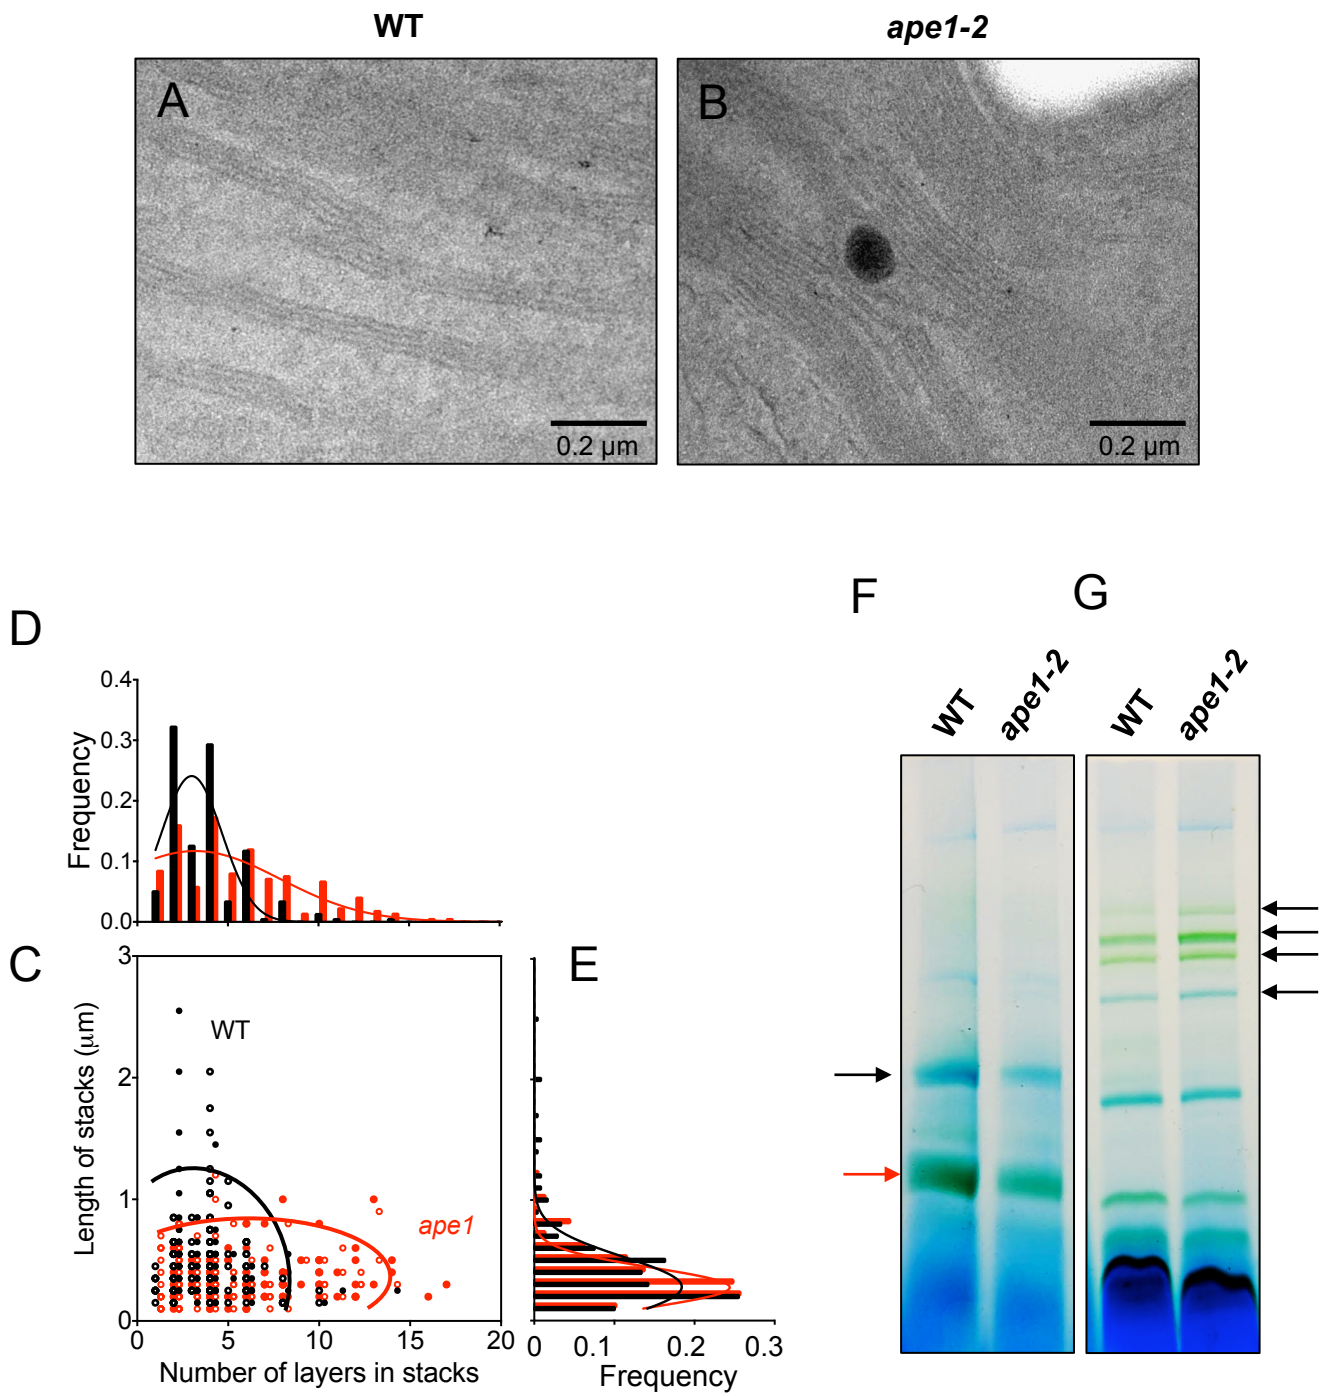

**Figure 10. *ape1* has shorter thylakoid stacks composed of more layers, its thylakoids are enriched in grana cores in comparison to end membranes and stromal lamellae.** Transmission Electron Microscope images of thylakoids of **A.** wild type and **B.** *ape1-2* from cells acclimated phototrophically in turbidostats at low light and ambient CO<sub>2</sub>. **C.** Comparison of the stacking of thylakoid membranes between *ape1-2* and wild type. The length of a stack is represented against the number of layers as a scatter plot with 95% confidence ellipses calculated with Matlab. **D.** and **E.** Data are projected into a single dimension giving the distribution of the number of layers and the length of the stacks with bell curves. Analysis is representative of 450 stacks and 85 TEM images. **F.** Differential solubilization of thylakoids of cells grown phototrophically at low light in batch cultures. Thylakoid membrane proteins were first solubilized using 1% digitonin to isolate end membranes and stromal lamellae and separated by BN-PAGE. Red arrow LHCII, black arrow PSII **G.** The remaining pellet containing mostly stacked regions was then solubilized with 1%  $\beta$ -DM and separated by BN-PAGE. Arrows show differential accumulation of PSII enriched bands between the mutant and wild type in the two solubilized fractions.



Figure 11. A

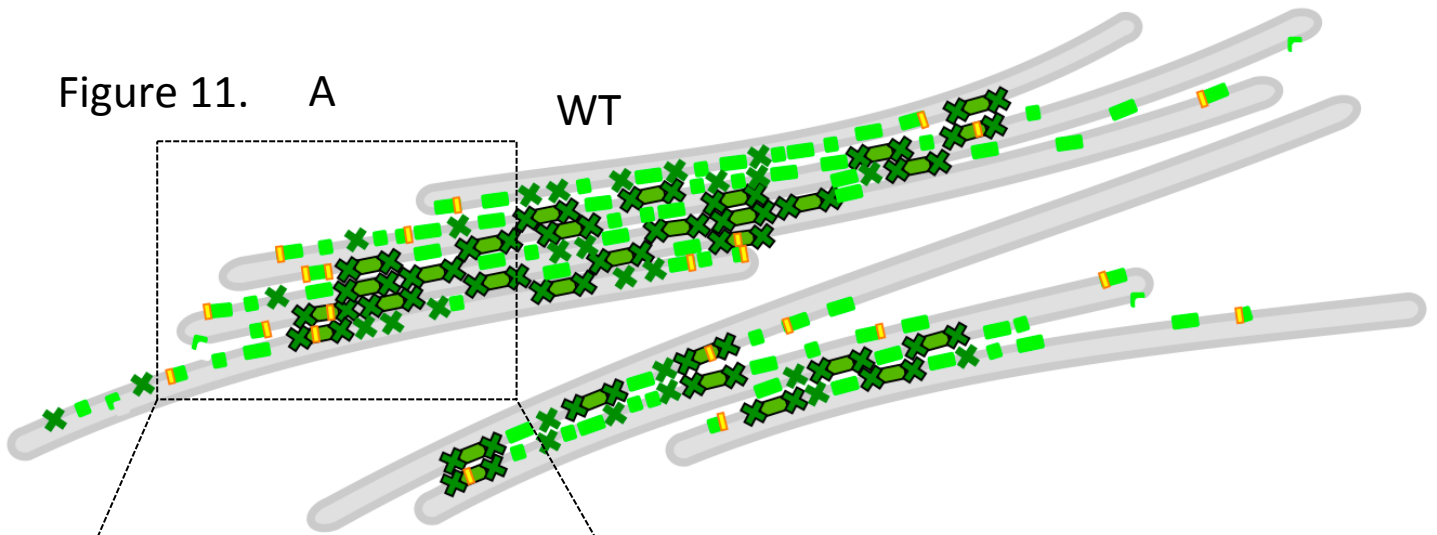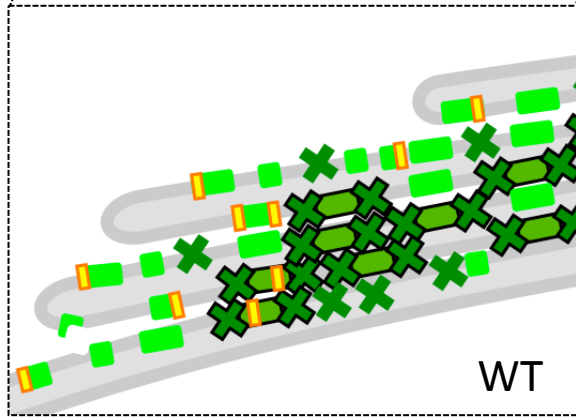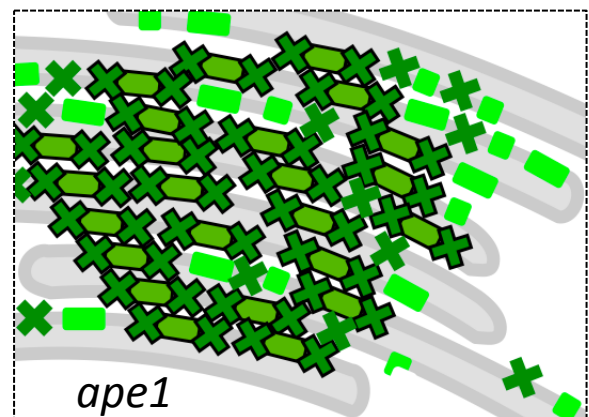

B

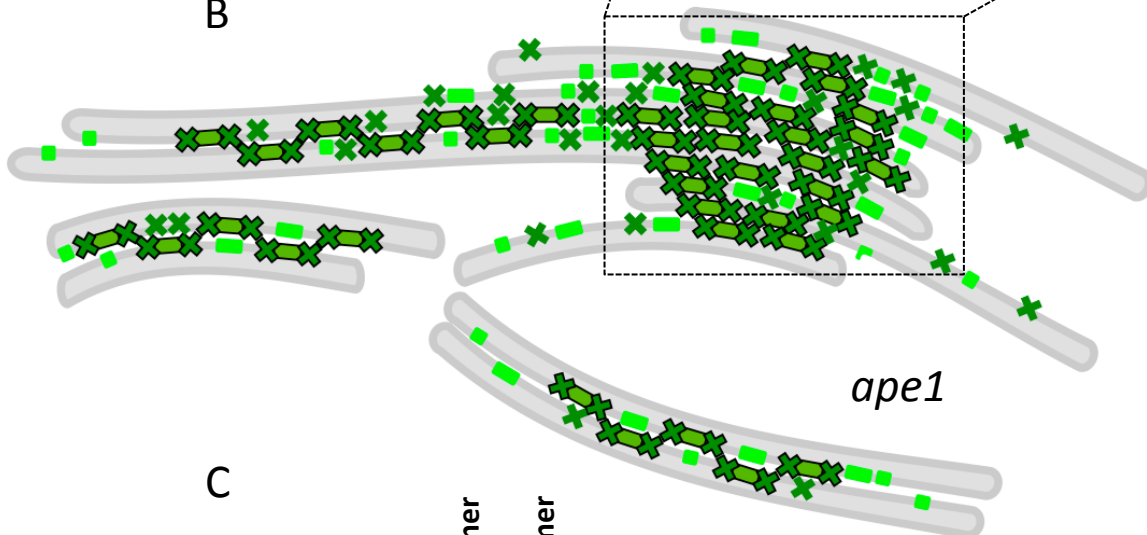

C

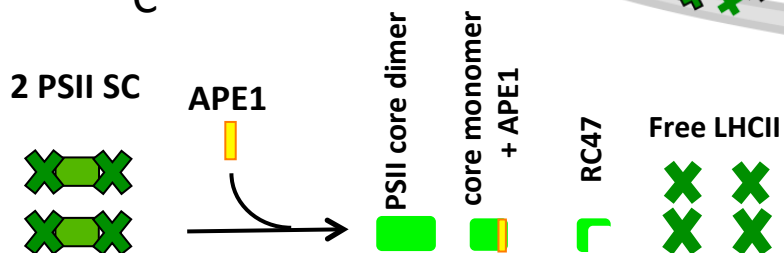

**Figure 11. Model: APE1 releases PSII supercomplexes in *Chlamydomonas reinhardtii*.** Thylakoid membranes (grey) and lumen (pale grey) harbor PSII of different oligomeric states. (To focus on PSII, other photosynthetic complexes are omitted in this illustration.) **A.** APE1 is bound to PSII core and not LHCII, when in PSII supercomplexes it releases core complexes. PSII complexes are heterogeneous in their oligomeric composition in cells grown phototrophically under ambient CO<sub>2</sub>. As a consequence, PSII plasticity influences the stacking of *Chlamydomonas* thylakoids. **B.** In the absence of APE1, PSII supercomplexes are more stable and interactions between the LHCII influence greater stacking of membranes that lead to a reduction in end-membranes and non-apressed membranes. It also affects the number of PSII cores that are free and not bound to LHCII and the total accumulation of PSII. **C.** An example equation for APE1 function: two PSII complexes plus interaction with APE1 results in PSII core dimer, PSII core monomer with APE1, RC47 + free LHCII

## Parsed Citations

- Adir, N., Zer, H., Shochat, S., and Ohad, I. (2003).** Photoinhibition - a historical perspective. *Photosynthesis research* 76, 343-370.  
Pubmed: [Author and Title](#)  
Google Scholar: [Author Only](#) [Title Only](#) [Author and Title](#)
- Albanese, P., Melero, R., Engel, B.D., Grinzato, A., Berto, P., Manfredi, M., Chiodoni, A., Vargas, J., Sorzano, C.O.S., Marengo, E., et al. (2017).** Pea PSII-LHCII supercomplexes form pairs by making connections across the stromal gap. *Scientific reports* 7, 10067.  
Pubmed: [Author and Title](#)  
Google Scholar: [Author Only](#) [Title Only](#) [Author and Title](#)
- Albanese, P., Nield, J., Tabares, J.A., Chiodoni, A., Manfredi, M., Gosetti, F., Marengo, E., Saracco, G., Barber, J., and Pagliano, C. (2016).** Isolation of novel PSII-LHCII megacomplexes from pea plants characterized by a combination of proteomics and electron microscopy. *Photosynthesis research* 130, 19-31.  
Pubmed: [Author and Title](#)  
Google Scholar: [Author Only](#) [Title Only](#) [Author and Title](#)
- Anderson, J.M., Chow, W.S., and Goodchild, D.J. (1988).** Thylakoid membrane organisation in sun/shade acclimation. *Austr J Plant Physiol* 15, 11–26.  
Pubmed: [Author and Title](#)  
Google Scholar: [Author Only](#) [Title Only](#) [Author and Title](#)
- Anderson, J.M., Chow, W.S., and Park, Y.I. (1995).** The grand design of photosynthesis: Acclimation of the photosynthetic apparatus to environmental cues. *Photosynthesis research* 46, 129-139.  
Pubmed: [Author and Title](#)  
Google Scholar: [Author Only](#) [Title Only](#) [Author and Title](#)
- Aslanidis, C., and de Jong, P.J. (1990).** Ligation-independent cloning of PCR products (LIC-PCR). *Nucleic acids research* 18, 6069-6074.  
Pubmed: [Author and Title](#)  
Google Scholar: [Author Only](#) [Title Only](#) [Author and Title](#)
- Baena-Gonzalez, E., and Sheen, J. (2008).** Convergent energy and stress signaling. *Trends in plant science* 13, 474-482.  
Pubmed: [Author and Title](#)  
Google Scholar: [Author Only](#) [Title Only](#) [Author and Title](#)
- Bec Kova, M., Yu, J., Krynicka, V., Kozlo, A., Shao, S., Konik, P., Komenda, J., Murray, J.W., and Nixon, P.J. (2017).** Structure of Psb29/Thf1 and its association with the FtsH protease complex involved in photosystem II repair in cyanobacteria. *Philosophical transactions of the Royal Society of London Series B, Biological sciences* 372.  
Pubmed: [Author and Title](#)  
Google Scholar: [Author Only](#) [Title Only](#) [Author and Title](#)
- Beck, C., Knoop, H., and Steuer, R. (2018).** Modules of co-occurrence in the cyanobacterial pan-genome reveal functional associations between groups of ortholog genes. *PLoS genetics* 14, e1007239.  
Pubmed: [Author and Title](#)  
Google Scholar: [Author Only](#) [Title Only](#) [Author and Title](#)
- Bielczynski, L.W., Schansker, G., and Croce, R. (2016).** Effect of Light Acclimation on the Organization of Photosystem II Super- and Sub-Complexes in *Arabidopsis thaliana*. *Frontiers in plant science* 7, 105.  
Pubmed: [Author and Title](#)  
Google Scholar: [Author Only](#) [Title Only](#) [Author and Title](#)
- Björkman, O., and Ludlow, M.M. (1972).** Characterization of the light climate on the floor of a Queensland rainforest. *Carnegie Inst Washington Yearbook* 71, 85–94.  
Pubmed: [Author and Title](#)  
Google Scholar: [Author Only](#) [Title Only](#) [Author and Title](#)
- Boekema, E.J., van Breemen, J.F., van Roon, H., and Dekker, J.P. (2000).** Arrangement of photosystem II supercomplexes in crystalline macrodomains within the thylakoid membrane of green plant chloroplasts. *Journal of molecular biology* 301, 1123-1133.  
Pubmed: [Author and Title](#)  
Google Scholar: [Author Only](#) [Title Only](#) [Author and Title](#)
- Boekema, E.J., van Roon, H., Calkoen, F., Bassi, R., and Dekker, J.P. (1999).** Multiple types of association of photosystem II and its light-harvesting antenna in partially solubilized photosystem II membranes. *Biochemistry* 38, 2233-2239.  
Pubmed: [Author and Title](#)  
Google Scholar: [Author Only](#) [Title Only](#) [Author and Title](#)
- Bricker, T.M., and Ghanotakis, D.F. (1996).** Introduction to Oxygen Evolution and the Oxygen-Evolving Complex. In *Oxygenic Photosynthesis: The Light Reactions Advances in Photosynthesis and Respiration* O. D.R., Y. C.F., and H. I.F., eds. (Dordrecht: Springer).  
Pubmed: [Author and Title](#)  
Google Scholar: [Author Only](#) [Title Only](#) [Author and Title](#)
- Caffarri, S., Kouril, R., Kereiche, S., Boekema, E.J., and Croce, R. (2009).** Functional architecture of higher plant photosystem II supercomplexes. *The EMBO journal* 28, 3052-3063.

- Pubmed: [Author and Title](#)  
Google Scholar: [Author Only Title Only Author and Title](#)
- Caffarri, S., Tibiletti, T., Jennings, R.C., and Santabarbara, S. (2014).** A comparison between plant photosystem I and photosystem II architecture and functioning. *Current protein & peptide science* 15, 296-331.  
Pubmed: [Author and Title](#)  
Google Scholar: [Author Only Title Only Author and Title](#)
- Chaux, F., Johnson, X., Auroy, P., Beyly-Adriano, A., Te, I., Cuine, S., and Peltier, G. (2017).** PGRL1 and LHCSR3 Compensate for Each Other in Controlling Photosynthesis and Avoiding Photosystem I Photoinhibition during High Light Acclimation of *Chlamydomonas* Cells. *Molecular plant* 10, 216-218.  
Pubmed: [Author and Title](#)  
Google Scholar: [Author Only Title Only Author and Title](#)
- Chaux, F., Peltier, G., and Johnson, X. (2015).** A security network in PSI photoprotection: regulation of photosynthetic control, NPQ and O<sub>2</sub> photoreduction by cyclic electron flow. *Frontiers in plant science* 6, 875.  
Pubmed: [Author and Title](#)  
Google Scholar: [Author Only Title Only Author and Title](#)
- Choquet, Y., Wostrikoff, K., Rimbault, B., Zito, F., Girard-Bascou, J., Drapier, D., and Wollman, F.A (2001).** Assembly-controlled regulation of chloroplast gene translation. *Biochemical Society transactions* 29, 421-426.  
Pubmed: [Author and Title](#)  
Google Scholar: [Author Only Title Only Author and Title](#)
- Chua, N.H., and Bennoun, P. (1975).** Thylakoid membrane polypeptides of *Chlamydomonas reinhardtii*: wild-type and mutant strains deficient in photosystem II reaction center. *Proceedings of the National Academy of Sciences of the United States of America* 72, 2175-2179.  
Pubmed: [Author and Title](#)  
Google Scholar: [Author Only Title Only Author and Title](#)
- Correa-Galvis, V., Poschmann, G., Melzer, M., Stuhler, K., and Jahns, P. (2016a).** PsbS interactions involved in the activation of energy dissipation in *Arabidopsis*. *Nature plants* 2, 15225.  
Pubmed: [Author and Title](#)  
Google Scholar: [Author Only Title Only Author and Title](#)
- Correa-Galvis, V., Redekop, P., Guan, K., Griess, A., Truong, T.B., Wakao, S., Niyogi, K.K., and Jahns, P. (2016b).** Photosystem II Subunit PsbS Is Involved in the Induction of LHCSR Protein-dependent Energy Dissipation in *Chlamydomonas reinhardtii*. *The Journal of biological chemistry* 291, 17478-17487.  
Pubmed: [Author and Title](#)  
Google Scholar: [Author Only Title Only Author and Title](#)
- Cuni, A., Xiong, L., Sayre, R., Rappaport, F., and Lavergne, J. (2004).** Modification of the pheophytin midpoint potential in photosystem II: Modulation of the quantum yield of charge separation and of charge recombination pathways. *Physical Chemistry Chemical Physics* 6, 4825-4831.  
Pubmed: [Author and Title](#)  
Google Scholar: [Author Only Title Only Author and Title](#)
- Dang, K.V., Plet, J., Tolleter, D., Jokel, M., Cuine, S., Carrier, P., Auroy, P., Richaud, P., Johnson, X., Alric, J., et al. (2014).** Combined increases in mitochondrial cooperation and oxygen photoreduction compensate for deficiency in cyclic electron flow in *Chlamydomonas reinhardtii*. *The Plant cell* 26, 3036-3050.  
Pubmed: [Author and Title](#)  
Google Scholar: [Author Only Title Only Author and Title](#)
- Danielsson, R., Suorsa, M., Paakkarinen, V., Albertsson, P.A., Styring, S., Aro, E.M., and Mamedov, F. (2006).** Dimeric and monomeric organization of photosystem II. Distribution of five distinct complexes in the different domains of the thylakoid membrane. *The Journal of biological chemistry* 281, 14241-14249.  
Pubmed: [Author and Title](#)  
Google Scholar: [Author Only Title Only Author and Title](#)
- Dent, R.M., Haglund, C.M., Chin, B.L., Kobayashi, M.C., and Niyogi, K.K. (2005).** Functional genomics of eukaryotic photosynthesis using insertional mutagenesis of *Chlamydomonas reinhardtii*. *Plant physiology* 137, 545-556.  
Pubmed: [Author and Title](#)  
Google Scholar: [Author Only Title Only Author and Title](#)
- Dinc, E., Ceppi, M.G., Toth, S.Z., Bottka, S., and Schansker, G. (2012).** The chl a fluorescence intensity is remarkably insensitive to changes in the chlorophyll content of the leaf as long as the chl a/b ratio remains unaffected. *Biochimica et biophysica acta* 1817, 770-779.  
Pubmed: [Author and Title](#)  
Google Scholar: [Author Only Title Only Author and Title](#)
- Drop, B., Webber-Birungi, M., Fusetti, F., Kouril, R., Redding, K.E., Boekema, E.J., and Croce, R. (2011).** Photosystem I of *Chlamydomonas reinhardtii* contains nine light-harvesting complexes (Lhca) located on one side of the core. *The Journal of biological chemistry* 286, 44878-44887.  
Pubmed: [Author and Title](#)

Google Scholar: [Author Only](#) [Title Only](#) [Author and Title](#)

**Drop, B., Webber-Birungi, M., Yadav, S.K., Filipowicz-Szymanska, A., Fusetti, F., Boekema, E.J., and Croce, R. (2014). Light-harvesting complex II (LHCII) and its supramolecular organization in *Chlamydomonas reinhardtii*. *Biochimica et biophysica acta* 1837, 63-72.**

Pubmed: [Author and Title](#)

Google Scholar: [Author Only](#) [Title Only](#) [Author and Title](#)

**Dumas, L., Chazaux, M., Peltier, G., Johnson, X., and Aric, J. (2016). Cytochrome b 6 f function and localization, phosphorylation state of thylakoid membrane proteins and consequences on cyclic electron flow. *Photosynthesis research* 129, 307-320.**

Pubmed: [Author and Title](#)

Google Scholar: [Author Only](#) [Title Only](#) [Author and Title](#)

**Engel, B.D., Schaffer, M., Kuhn Cuellar, L., Villa, E., Pnitzko, J.M., and Baumeister, W. (2015). Native architecture of the *Chlamydomonas chloroplast* revealed by in situ cryo-electron tomography. *eLife* 4.**

Pubmed: [Author and Title](#)

Google Scholar: [Author Only](#) [Title Only](#) [Author and Title](#)

**Erickson, E., Wakao, S., and Niyogi, K.K. (2015). Light stress and photoprotection in *Chlamydomonas reinhardtii*. *The Plant journal : for cell and molecular biology* 82, 449-465.**

Pubmed: [Author and Title](#)

Google Scholar: [Author Only](#) [Title Only](#) [Author and Title](#)

**Farquhar, G.D., von Caemmerer, S., and Berry, J.A (1980). A biochemical model of photosynthetic CO<sub>2</sub> assimilation in leaves of C<sub>3</sub> species. *Planta* 149, 78-90.**

Pubmed: [Author and Title](#)

Google Scholar: [Author Only](#) [Title Only](#) [Author and Title](#)

**Fischer, B.B., Dayer, R., Schwarzenbach, Y., Lemaire, S.D., Behra, R., Liedtke, A., and Eggen, R.I. (2009). Function and regulation of the glutathione peroxidase homologous gene GPXH/GPX5 in *Chlamydomonas reinhardtii*. *Plant molecular biology* 71, 569-583.**

Pubmed: [Author and Title](#)

Google Scholar: [Author Only](#) [Title Only](#) [Author and Title](#)

**Gonzalez-Ballester, D., de Montaigu, A., Galvan, A., and Fernandez, E. (2005). Restriction enzyme site-directed amplification PCR: a tool to identify regions flanking a marker DNA. *Analytical biochemistry* 340, 330-335.**

Pubmed: [Author and Title](#)

Google Scholar: [Author Only](#) [Title Only](#) [Author and Title](#)

**Goodenough, U.W., Armstrong, J.J., and Levine, R.P. (1969). Photosynthetic Properties of ac-31, a Mutant Strain of *Chlamydomonas reinhardtii* Devoid of Chloroplast Membrane Stacking. *Plant physiology* 44, 1001-1012.**

Pubmed: [Author and Title](#)

Google Scholar: [Author Only](#) [Title Only](#) [Author and Title](#)

**Goodenough, U.W., and Levine, R.P. (1969). Chloroplast Ultrastructure in Mutant Strains of *Chlamydomonas reinhardtii* Lacking Components of the Photosynthetic Apparatus. *Plant physiology* 44, 990-1000.**

Pubmed: [Author and Title](#)

Google Scholar: [Author Only](#) [Title Only](#) [Author and Title](#)

**Goodenough, U.W., and Staehelin, L.A (1971). Structural differentiation of stacked and unstacked chloroplast membranes. Freeze-etch electron microscopy of wild-type and mutant strains of *Chlamydomonas*. *The Journal of cell biology* 48, 594-619.**

Pubmed: [Author and Title](#)

Google Scholar: [Author Only](#) [Title Only](#) [Author and Title](#)

**Guenther, J.E., and Melis, A (1990). The physiological significance of photosystem II heterogeneity in chloroplasts. *Photosynthesis research* 23, 105-109.**

Pubmed: [Author and Title](#)

Google Scholar: [Author Only](#) [Title Only](#) [Author and Title](#)

**Harris, E.H. (1989). *The Chlamydomonas Sourcebook: A Comprehensive***

***Guide to Biology and Laboratory Use.* (San Diego: Academic Press, ).**

**Heinzel, M.L., and Grossman, A.R. (2013). The GreenCut: re-evaluation of physiological role of previously studied proteins and potential novel protein functions. *Photosynthesis research* 116, 427-436.**

Pubmed: [Author and Title](#)

Google Scholar: [Author Only](#) [Title Only](#) [Author and Title](#)

**Herbstová, M., Tietz, S., Kinzel, C., Turkina, M.V., and Kirchoff, H. (2012). Architectural switch in plant photosynthetic membranes induced by light stress. *Proceedings of the National Academy of Sciences* 109, 20130-20135.**

Pubmed: [Author and Title](#)

Google Scholar: [Author Only](#) [Title Only](#) [Author and Title](#)

**Huang, W., Chen, Q., Zhu, Y., Hu, F., Zhang, L., Ma, Z., He, Z., and Huang, J. (2013). *Arabidopsis thylakoid formation 1* is a critical regulator for dynamics of PSII-LHCII complexes in leaf senescence and excess light. *Molecular plant* 6, 1673-1691.**

Pubmed: [Author and Title](#)

Google Scholar: [Author Only](#) [Title Only](#) [Author and Title](#)



- Jarvi, S., Suorsa, M., and Aro, E.M. (2015). Photosystem II repair in plant chloroplasts--Regulation, assisting proteins and shared components with photosystem II biogenesis. *Biochimica et biophysica acta* 1847, 900-909.  
Pubmed: [Author and Title](#)  
Google Scholar: [Author Only](#) [Title Only](#) [Author and Title](#)
- Johnson, X., Steinbeck, J., Dent, R.M., Takahashi, H., Richaud, P., Ozawa, S., Houille-Vernes, L., Petroutsos, D., Rappaport, F., Grossman, A.R., et al. (2014). Proton gradient regulation 5-mediated cyclic electron flow under ATP- or redox-limited conditions: a study of DeltaATPase pgr5 and DeltarbcL pgr5 mutants in the green alga *Chlamydomonas reinhardtii*. *Plant physiology* 165, 438-452.  
Pubmed: [Author and Title](#)  
Google Scholar: [Author Only](#) [Title Only](#) [Author and Title](#)
- Johnson, X., Vandystadt, G., Bujaldon, S., Wollman, F.A., Dubois, R., Roussel, P., Alric, J., and Beal, D. (2009). A new setup for in vivo fluorescence imaging of photosynthetic activity. *Photosynthesis research* 102, 85-93.  
Pubmed: [Author and Title](#)  
Google Scholar: [Author Only](#) [Title Only](#) [Author and Title](#)
- Johnson, X., Wostrickoff, K., Finazzi, G., Kuras, R., Schwarz, C., Bujaldon, S., Nickelsen, J., Stern, D.B., Wollman, F.A., and Vallon, O. (2010). MRL1, a conserved Pentatricopeptide repeat protein, is required for stabilization of rbcL mRNA in *Chlamydomonas* and *Arabidopsis*. *The Plant cell* 22, 234-248.  
Pubmed: [Author and Title](#)  
Google Scholar: [Author Only](#) [Title Only](#) [Author and Title](#)
- Kallberg, M., Wang, H., Wang, S., Peng, J., Wang, Z., Lu, H., and Xu, J. (2012). Template-based protein structure modeling using the RaptorX web server. *Nature protocols* 7, 1511-1522.  
Pubmed: [Author and Title](#)  
Google Scholar: [Author Only](#) [Title Only](#) [Author and Title](#)
- Khan, N.Z., Lindquist, E., and Aronsson, H. (2013). New putative chloroplast vesicle transport components and cargo proteins revealed using a bioinformatics approach: an *Arabidopsis* model. *PLoS one* 8, e59898.  
Pubmed: [Author and Title](#)  
Google Scholar: [Author Only](#) [Title Only](#) [Author and Title](#)
- Khatoun, M., Inagawa, K., Pospisil, P., Yamashita, A., Yoshioka, M., Lundin, B., Horie, J., Morita, N., Jajoo, A., Yamamoto, Y., et al. (2009). Quality control of photosystem II: Thylakoid unstacking is necessary to avoid further damage to the D1 protein and to facilitate D1 degradation under light stress in spinach thylakoids. *The Journal of biological chemistry* 284, 25343-25352.  
Pubmed: [Author and Title](#)  
Google Scholar: [Author Only](#) [Title Only](#) [Author and Title](#)
- Kirchhoff, H. (2019). Chloroplast ultrastructure in plants. *The New phytologist* 223, 565-574.  
Pubmed: [Author and Title](#)  
Google Scholar: [Author Only](#) [Title Only](#) [Author and Title](#)
- Komenda, J., and Sobotka, R. (2016). Cyanobacterial high-light-inducible proteins--Protectors of chlorophyll-protein synthesis and assembly. *Biochimica et biophysica acta* 1857, 288-295.  
Pubmed: [Author and Title](#)  
Google Scholar: [Author Only](#) [Title Only](#) [Author and Title](#)
- Koochak, H., Puthiyaveetil, S., Mullendore, D.L., Li, M., and Kirchhoff, H. (2019). The structural and functional domains of plant thylakoid membranes. *The Plant journal : for cell and molecular biology* 97, 412-429.  
Pubmed: [Author and Title](#)  
Google Scholar: [Author Only](#) [Title Only](#) [Author and Title](#)
- Kouril, R., Lukas, N., Semchonok, D.A., Boekema, E.J., and Ilik, P. (2018). Membrane Protein Complexes: Structure and Function. In *Subcellular Biochemistry*, E.J.B. J. Robin Harris, ed. (Singapore: Springer), p. 459.  
Pubmed: [Author and Title](#)  
Google Scholar: [Author Only](#) [Title Only](#) [Author and Title](#)
- Kouril, R., Wentjes, E., Bultema, J.B., Croce, R., and Boekema, E.J. (2013). High-light vs. low-light: effect of light acclimation on photosystem II composition and organization in *Arabidopsis thaliana*. *Biochimica et biophysica acta* 1827, 411-419.  
Pubmed: [Author and Title](#)  
Google Scholar: [Author Only](#) [Title Only](#) [Author and Title](#)
- Larosa, V., Meneghesso, A., La Rocca, N., Steinbeck, J., Hippler, M., Szabo, I., and Morosinotto, T. (2018). Mitochondria Affect Photosynthetic Electron Transport and Photosensitivity in a Green Alga. *Plant physiology* 176, 2305-2314.  
Pubmed: [Author and Title](#)  
Google Scholar: [Author Only](#) [Title Only](#) [Author and Title](#)
- Li, X., Zhang, R., Patena, W., Gang, S.S., Blum, S.R., Ivanova, N., Yue, R., Robertson, J.M., Lefebvre, P.A., Fitz-Gibbon, S.T., et al. (2016). An Indexed, Mapped Mutant Library Enables Reverse Genetics Studies of Biological Processes in *Chlamydomonas reinhardtii*. *The Plant cell* 28, 367-387.  
Pubmed: [Author and Title](#)  
Google Scholar: [Author Only](#) [Title Only](#) [Author and Title](#)
- Lu, Y. (2016). Identification and Roles of Photosystem II Assembly, Stability, and Repair Factors in *Arabidopsis*. *Frontiers in plant*



science 7, 168.

Pubmed: [Author and Title](#)

Google Scholar: [Author Only Title Only Author and Title](#)

**Majeran, W., Zybailov, B., Ytterberg, A.J., Dunsmore, J., Sun, Q., and van Wijk, K.J. (2008). Consequences of C4 differentiation for chloroplast membrane proteomes in maize mesophyll and bundle sheath cells. *Molecular & cellular proteomics* : MCP 7, 1609-1638.**

Pubmed: [Author and Title](#)

Google Scholar: [Author Only Title Only Author and Title](#)

**Melis, A (1991). Dynamics of photosynthetic membrane composition and function. *Biochimica et biophysica acta* 1058, 87–106.**

Pubmed: [Author and Title](#)

Google Scholar: [Author Only Title Only Author and Title](#)

**Melis, A (1996). Excitation energy transfer: functional and dynamic**

**aspects of Lhc (cab) proteins. In *Oxygenic Photosynthesis: The Light Reactions***

**Volume 4 of *Advances in Photosynthesis and Respiration*, D.R. Ort, and C.F. Yocum, eds. (Dordrecht, The Netherlands: Kluwer Academic Publishers), pp. 523–538.**

Pubmed: [Author and Title](#)

Google Scholar: [Author Only Title Only Author and Title](#)

**Melis, A, and Homann, P.H. (1976). Heterogeneity of the Photochemical centres in system II of Chloroplasts *Photochemistry and Photobiology* 23, 343-350.**

Pubmed: [Author and Title](#)

Google Scholar: [Author Only Title Only Author and Title](#)

**Merchant, S.S., Prochnik, S.E., Vallon, O., Harris, E.H., Karpowicz, S.J., Witman, G.B., Terry, A, Salamov, A, Fritz-Laylin, L.K., Marechal-Drouard, L., et al. (2007). The *Chlamydomonas* genome reveals the evolution of key animal and plant functions. *Science* 318, 245-250.**

Pubmed: [Author and Title](#)

Google Scholar: [Author Only Title Only Author and Title](#)

**Michaeli, S., Honig, A, Levanony, H., Peled-Zehavi, H., and Galili, G. (2014). Arabidopsis ATG8-INTERACTING PROTEIN1 is involved in autophagy-dependent vesicular trafficking of plastid proteins to the vacuole. *The Plant cell* 26, 4084-4101.**

Pubmed: [Author and Title](#)

Google Scholar: [Author Only Title Only Author and Title](#)

**Mulkijanian, A.Y., Koonin, E.V., Makarova, K.S., Mekhedov, S.L., Sorokin, A, Wolf, Y.I., Dufresne, A, Partensky, F., Burd, H., Kaznadzey, D., et al. (2006). The cyanobacterial genome core and the origin of photosynthesis. *Proceedings of the National Academy of Sciences of the United States of America* 103, 13126-13131.**

Pubmed: [Author and Title](#)

Google Scholar: [Author Only Title Only Author and Title](#)

**Munekage, Y.N., Genty, B., and Peltier, G. (2008). Effect of PGR5 impairment on photosynthesis and growth in *Arabidopsis thaliana*. *Plant & cell physiology* 49, 1688-1698.**

Pubmed: [Author and Title](#)

Google Scholar: [Author Only Title Only Author and Title](#)

**Muranaka, L.S., Rutgers, M., Bujaldon, S., Heublein, A, Geimer, S., Wollman, F.A, and Schroda, M. (2016). TEF30 Interacts with Photosystem II Monomers and Is Involved in the Repair of Photodamaged Photosystem II in *Chlamydomonas reinhardtii*. *Plant physiology* 170, 821-840.**

Pubmed: [Author and Title](#)

Google Scholar: [Author Only Title Only Author and Title](#)

**Myouga, F., Takahashi, K., Tanaka, R., Nagata, N., Kiss, A.Z, Funk, C., Nomura, Y., Nakagami, H., Jansson, S., and Shinozaki, K. (2018). Stable Accumulation of Photosystem II Requires ONE-HELIX PROTEIN1 (OHP1) of the Light Harvesting-Like Family. *Plant physiology* 176, 2277-2291.**

Pubmed: [Author and Title](#)

Google Scholar: [Author Only Title Only Author and Title](#)

**Nawrocki, W.J., Liu, X., and Croce, R. (2020). *Chlamydomonas reinhardtii* Exhibits De Facto Constitutive NPQ Capacity in Physiologically Relevant Conditions. *Plant physiology* 182, 472-479.**

Pubmed: [Author and Title](#)

Google Scholar: [Author Only Title Only Author and Title](#)

**Pagliano, C., Barera, S., Chimirri, F., Saracco, G., and Barber, J. (2012). Comparison of the alpha and beta isomeric forms of the detergent n-dodecyl-D-maltoside for solubilizing photosynthetic complexes from pea thylakoid membranes. *Biochimica et biophysica acta* 1817, 1506-1515.**

Pubmed: [Author and Title](#)

Google Scholar: [Author Only Title Only Author and Title](#)

**Plochinger, M., Schwenkert, S., von Sydow, L., Schroder, W.P., and Meurer, J. (2016). Functional Update of the Auxiliary Proteins PsbW, PsbY, HCF136, PsbN, TerC and ALB3 in Maintenance and Assembly of PSII. *Frontiers in plant science* 7, 423.**

Pubmed: [Author and Title](#)

Google Scholar: [Author Only Title Only Author and Title](#)

**Polukhina, I., Fristedt, R., Dinc, E., Cardol, P., and Croce, R. (2016). Carbon Supply and Photoacclimation Cross Talk in the Green Alga *Chlamydomonas reinhardtii*. *Plant physiology* 172, 1494-1505.**

Pubmed: [Author and Title](#)

Google Scholar: [Author Only Title Only Author and Title](#)

**Pribil, M., Labs, M., and Leister, D. (2014). Structure and dynamics of thylakoids in land plants. *J Exp Bot* 65, 1955-1972.**

Pubmed: [Author and Title](#)

Google Scholar: [Author Only Title Only Author and Title](#)

**Pribil, M., Sandoval-Ibanez, O., Xu, W., Sharma, A., Labs, M., Liu, Q., Galgenmuller, C., Schneider, T., Wessels, M., Matsubara, S., et al. (2018). Fine-Tuning of Photosynthesis Requires CURVATURE THYLAKOID1-Mediated Thylakoid Plasticity. *Plant physiology* 176, 2351-2364.**

Pubmed: [Author and Title](#)

Google Scholar: [Author Only Title Only Author and Title](#)

**Rexroth, S., Meyer zu Tittingdorf, J.M., Krause, F., Dencher, N.A., and Seelert, H. (2003). Thylakoid membrane at altered metabolic state: challenging the forgotten realms of the proteome. *Electrophoresis* 24, 2814-2823.**

Pubmed: [Author and Title](#)

Google Scholar: [Author Only Title Only Author and Title](#)

**Rexroth, S., Mullineaux, C.W., Ellinger, D., Sendtko, E., Rogner, M., and Koenig, F. (2011). The plasma membrane of the cyanobacterium *Gloeobacter violaceus* contains segregated bioenergetic domains. *The Plant cell* 23, 2379-2390.**

Pubmed: [Author and Title](#)

Google Scholar: [Author Only Title Only Author and Title](#)

**Roach, T., Baur, T., Stoggl, W., and Krieger-Liszky, A. (2017). *Chlamydomonas reinhardtii* responding to high light: a role for 2-propranal (acrolein). *Physiologia plantarum* 161, 75-87.**

Pubmed: [Author and Title](#)

Google Scholar: [Author Only Title Only Author and Title](#)

**Rochaix, J.D. (2014). Regulation and dynamics of the light-harvesting system. *Annual review of plant biology* 65, 287-309.**

Pubmed: [Author and Title](#)

Google Scholar: [Author Only Title Only Author and Title](#)

**Rozak, P.R., Seiser, R.M., Wacholtz, W.F., and Wise, R.R. (2002). Rapid, reversible alterations in spinach thylakoid appression upon changes in light intensity. *Plant, Cell and Environment* 25, 421-429.**

Pubmed: [Author and Title](#)

Google Scholar: [Author Only Title Only Author and Title](#)

**Schroda, M., Beck, C.F., and Vallon, O. (2002). Sequence elements within an HSP70 promoter counteract transcriptional transgene silencing in *Chlamydomonas*. *The Plant journal : for cell and molecular biology* 31, 445-455.**

Pubmed: [Author and Title](#)

Google Scholar: [Author Only Title Only Author and Title](#)

**Schwarz, E.M., Tietz, S., and Froehlich, J.E. (2018). Photosystem I-LHCII megacomplexes respond to high light and aging in plants. *Photosynthesis research* 136, 107-124.**

Pubmed: [Author and Title](#)

Google Scholar: [Author Only Title Only Author and Title](#)

**Semchonok, D.A., Sathish Yadav, K.N., Xu, P., Drop, B., Croce, R., and Boekema, E.J. (2017). Interaction between the photoprotective protein LHCSR3 and C2S2 Photosystem II supercomplex in *Chlamydomonas reinhardtii*. *Biochimica et biophysica acta Bioenergetics* 1858, 379-385.**

Pubmed: [Author and Title](#)

Google Scholar: [Author Only Title Only Author and Title](#)

**Shen, L., Huang, Z., Chang, S., Wang, W., Wang, J., Kuang, T., Han, G., Shen, J.R., and Zhang, X. (2019). Structure of a C2S2M2N2-type PSII-LHCII supercomplex from the green alga *Chlamydomonas reinhardtii*. *Proceedings of the National Academy of Sciences of the United States of America* 116, 21246-21255.**

Pubmed: [Author and Title](#)

Google Scholar: [Author Only Title Only Author and Title](#)

**Shi, L.X., Hall, M., Funk, C., and Schroder, W.P. (2012). Photosystem II, a growing complex: updates on newly discovered components and low molecular mass proteins. *Biochimica et biophysica acta* 1817, 13-25.**

Pubmed: [Author and Title](#)

Google Scholar: [Author Only Title Only Author and Title](#)

**Sizova, I., Fuhrmann, M., and Hegemann, P. (2001). A *Streptomyces rimosus* aphVIII gene coding for a new type phosphotransferase provides stable antibiotic resistance to *Chlamydomonas reinhardtii*. *Gene* 277, 221-229.**

Pubmed: [Author and Title](#)

Google Scholar: [Author Only Title Only Author and Title](#)

**Stark, H. (2010). GraFix: stabilization of fragile macromolecular complexes for single particle cryo-EM. *Methods in enzymology* 481, 109-126.**

Pubmed: [Author and Title](#)

- Google Scholar: [Author Only](#) [Title Only](#) [Author and Title](#)
- Su, X., Ma, J., Wei, X., Cao, P., Zhu, D., Chang, W., Liu, Z., Zhang, X., and Li, M. (2017).** Structure and assembly mechanism of plant C2S2M2-type PSII-LHCII supercomplex. *Science* 357, 815-820.  
Pubmed: [Author and Title](#)  
Google Scholar: [Author Only](#) [Title Only](#) [Author and Title](#)
- Suorsa, M., Rantala, M., Mamedov, F., Lespinasse, M., Trotta, A., Grieco, M., Vuorio, E., Tikkanen, M., Jarvi, S., and Aro, E.M. (2015).** Light acclimation involves dynamic re-organization of the pigment-protein megacomplexes in non-appressed thylakoid domains. *The Plant journal : for cell and molecular biology* 84, 360-373.  
Pubmed: [Author and Title](#)  
Google Scholar: [Author Only](#) [Title Only](#) [Author and Title](#)
- Terashima, M., Specht, M., and Hippler, M. (2011).** The chloroplast proteome: a survey from the *Chlamydomonas reinhardtii* perspective with a focus on distinctive features. *Current genetics* 57, 151-168.  
Pubmed: [Author and Title](#)  
Google Scholar: [Author Only](#) [Title Only](#) [Author and Title](#)
- Theis, J., and Schroda, M. (2016).** Revisiting the photosystem II repair cycle. *Plant Signaling & Behavior* 11, e1218587.  
Pubmed: [Author and Title](#)  
Google Scholar: [Author Only](#) [Title Only](#) [Author and Title](#)
- Thornton, L.E., Ohkawa, H., Roose, J.L., Kashino, Y., Keren, N., and Pakrasi, H.B. (2004).** Homologs of plant PsbP and PsbQ proteins are necessary for regulation of photosystem ii activity in the cyanobacterium *Synechocystis* 6803. *The Plant cell* 16, 2164-2175.  
Pubmed: [Author and Title](#)  
Google Scholar: [Author Only](#) [Title Only](#) [Author and Title](#)
- Tibiletti, T., Auroy, P., Peltier, G., and Caffarri, S. (2016).** *Chlamydomonas reinhardtii* PsbS Protein Is Functional and Accumulates Rapidly and Transiently under High Light. *Plant physiology* 171, 2717-2730.  
Pubmed: [Author and Title](#)  
Google Scholar: [Author Only](#) [Title Only](#) [Author and Title](#)
- Tomizioli, M., Lazar, C., Brugiére, S., Burger, T., Salvi, D., Gatto, L., Moyet, L., Breckels, L.M., Hesse, A.M., Lilley, K.S., et al. (2014).** Deciphering thylakoid sub-compartments using a mass spectrometry-based approach. *Molecular & cellular proteomics : MCP* 13, 2147-2167.  
Pubmed: [Author and Title](#)  
Google Scholar: [Author Only](#) [Title Only](#) [Author and Title](#)
- Torabi, S., Umate, P., Manavski, N., Plochingner, M., Kleinknecht, L., Bogireddi, H., Herrmann, R.G., Wanner, G., Schroder, W.P., and Meurer, J. (2014).** PsbN is required for assembly of the photosystem II reaction center in *Nicotiana tabacum*. *The Plant cell* 26, 1183-1199.  
Pubmed: [Author and Title](#)  
Google Scholar: [Author Only](#) [Title Only](#) [Author and Title](#)
- Tyytjarvi, E., and Aro, E.M. (1996).** The rate constant of photoinhibition, measured in lincomycin-treated leaves, is directly proportional to light intensity. *Proceedings of the National Academy of Sciences of the United States of America* 93, 2213-2218.  
Pubmed: [Author and Title](#)  
Google Scholar: [Author Only](#) [Title Only](#) [Author and Title](#)
- Umena, Y., Kawakami, K., Shen, J.R., and Kamiya, N. (2011).** Crystal structure of oxygen-evolving photosystem II at a resolution of 1.9 Å. *Nature* 473, 55-60.  
Pubmed: [Author and Title](#)  
Google Scholar: [Author Only](#) [Title Only](#) [Author and Title](#)
- Walters, R.G. (2005).** Towards an understanding of photosynthetic acclimation. *J Exp Bot* 56, 435-447.  
Pubmed: [Author and Title](#)  
Google Scholar: [Author Only](#) [Title Only](#) [Author and Title](#)
- Walters, R.G., Shephard, F., Rogers, J.J., Rolfe, S.A., and Horton, P. (2003).** Identification of mutants of *Arabidopsis* defective in acclimation of photosynthesis to the light environment. *Plant physiology* 131, 472-481.  
Pubmed: [Author and Title](#)  
Google Scholar: [Author Only](#) [Title Only](#) [Author and Title](#)
- Wang, L., Yamano, T., Takane, S., Niikawa, Y., Toyokawa, C., Ozawa, S.I., Tokutsu, R., Takahashi, Y., Minagawa, J., Kanesaki, Y., et al. (2016).** Chloroplast-mediated regulation of CO<sub>2</sub>-concentrating mechanism by Ca<sup>2+</sup>-binding protein CAS in the green alga *Chlamydomonas reinhardtii*. *Proceedings of the National Academy of Sciences of the United States of America* 113, 12586-12591.  
Pubmed: [Author and Title](#)  
Google Scholar: [Author Only](#) [Title Only](#) [Author and Title](#)
- Wei, X., Su, X., Cao, P., Liu, X., Chang, W., Li, M., Zhang, X., and Liu, Z. (2016).** Structure of spinach photosystem II-LHCII supercomplex at 3.2 Å resolution. *Nature* 534, 69-74.  
Pubmed: [Author and Title](#)  
Google Scholar: [Author Only](#) [Title Only](#) [Author and Title](#)
- Yang, D.H., Webster, J., Adam, Z., Lindahl, M., and Andersson, B. (1998).** Induction of acclimative proteolysis of the light-harvesting

chlorophyll a/b protein of photosystem II in response to elevated light intensities. *Plant physiology* 118, 827-834.

Pubmed: [Author and Title](#)

Google Scholar: [Author Only](#) [Title Only](#) [Author and Title](#)

Zehr, J.P., Bench, S.R., Carter, B.J., Hewson, I., Niazi, F., Shi, T., Tripp, H.J., and Affourtit, J.P. (2008). Globally distributed uncultivated oceanic N<sub>2</sub>-fixing cyanobacteria lack oxygenic photosystem II. *Science* 322, 1110-1112.

Pubmed: [Author and Title](#)

Google Scholar: [Author Only](#) [Title Only](#) [Author and Title](#)

Zhang, R., Patena, W., Armbruster, U., Gang, S.S., Blum, S.R., and Jonikas, M.C. (2014). High-Throughput Genotyping of Green Algal Mutants Reveals Random Distribution of Mutagenic Insertion Sites and Endonucleolytic Cleavage of Transforming DNA. *The Plant cell* 26, 1398-1409.

Pubmed: [Author and Title](#)

Google Scholar: [Author Only](#) [Title Only](#) [Author and Title](#)
